# Supplementary material
Source: ML conference proceedings conference paper supplement (https://openreview.net/forum?id=7T2XgpklLDA)
Supplement: supplementary_material [file attachment]

|               |          |              |              |          |              |       |
|---------------|----------|--------------|--------------|----------|--------------|-------|
| ResNet 50     |          |              |              |          |              |       |
|               | lr \ wd  | 1.00E-03     | 1.00E-04     | 1.00E-05 | 1.00E-06     | 0     |
| SGD / Step    | 1.00E-01 | 82.41        | 82.92        | 74.91    | 84.39        | 80.35 |
|               | 1.00E-02 | 86.36        | <b>86.36</b> | 85.89    | 85.93        | 85.65 |
|               | 1.00E-03 | 85.82        | 85.65        | 85.82    | 85.58        | 85.93 |
|               | 1.00E-04 | 78.71        | 78.76        | 78.74    | 79.02        | 78.81 |
| SGD / Cosine  | 1.00E-01 | 85.09        | 83.83        | 78.83    | 77.78        | 85.16 |
|               | 1.00E-02 | 85.96        | <b>86.10</b> | 85.61    | 85.65        | 85.82 |
|               | 1.00E-03 | 85.56        | 85.98        | 85.93    | 86.03        | 85.84 |
|               | 1.00E-04 | 78.74        | 78.39        | 78.34    | 78.60        | 78.25 |
| Adam / Cosine | 1.00E-02 | 84.36        | 85.48        | 84.90    | 84.36        | 85.25 |
|               | 1.00E-03 | <b>87.75</b> | 87.61        | 87.07    | 87.30        | 87.70 |
|               | 1.00E-04 | 87.12        | 86.63        | 86.63    | 86.49        | 86.60 |
|               | 1.00E-05 | 86.79        | 86.18        | 86.39    | 85.92        | 86.58 |
|               |          |              |              |          |              |       |
|               |          |              |              |          |              |       |
| AlexNet       |          |              |              |          |              |       |
|               | lr \ wd  | 1.00E-03     | 1.00E-04     | 1.00E-05 | 1.00E-06     | 0     |
| SGD / Step    | 1.00E-01 | 0.00         | 0.00         | 0.00     | 0.00         | 0.00  |
|               | 1.00E-02 | 0.00         | 0.00         | 61.50    | 0.00         | 0.00  |
|               | 1.00E-03 | 80.93        | <b>81.50</b> | 81.31    | 81.29        | 80.91 |
|               | 1.00E-04 | 76.85        | 77.03        | 77.29    | 77.22        | 76.89 |
| SGD / Cosine  | 1.00E-01 | 0.00         | 0.00         | 0.00     | 0.00         | 0.00  |
|               | 1.00E-02 | 0.00         | 0.00         | 0.00     | 0.00         | 0.00  |
|               | 1.00E-03 | 81.21        | 81.21        | 81.12    | <b>81.38</b> | 81.29 |
|               | 1.00E-04 | 77.24        | 77.55        | 77.36    | 76.78        | 77.31 |
| Adam / Cosine | 1.00E-02 | 61.52        | 61.52        | 61.52    | 61.52        | 61.52 |
|               | 1.00E-03 | 79.85        | 61.52        | 61.52    | 80.22        | 61.52 |
|               | 1.00E-04 | 82.49        | <b>82.58</b> | 82.02    | 81.97        | 82.02 |
|               | 1.00E-05 | 75.89        | 81.06        | 80.22    | 80.24        | 80.10 |
|               |          |              |              |          |              |       |
|               |          |              |              |          |              |       |

|               |          |              |              |              |              |       |
|---------------|----------|--------------|--------------|--------------|--------------|-------|
| VGG13BN       |          |              |              |              |              |       |
|               | lr \ wd  | 1.00E-03     | 1.00E-04     | 1.00E-05     | 1.00E-06     | 0     |
| SGD / Step    | 1.00E-01 | 87.48        | 87.80        | <b>88.48</b> | 87.90        | 88.06 |
|               | 1.00E-02 | 86.89        | 87.27        | 87.06        | 87.41        | 86.82 |
|               | 1.00E-03 | 86.94        | 86.94        | 86.89        | 86.96        | 86.78 |
|               | 1.00E-04 | 81.40        | 81.73        | 81.85        | 81.52        | 81.75 |
| SGD / Cosine  | 1.00E-01 | <b>88.25</b> | 87.71        | 87.62        | 87.36        | 87.78 |
|               | 1.00E-02 | 86.80        | 87.29        | 86.92        | 86.50        | 87.03 |
|               | 1.00E-03 | 86.96        | 87.22        | 86.85        | 86.64        | 87.06 |
|               | 1.00E-04 | 81.61        | 81.73        | 81.12        | 81.26        | 81.45 |
| Adam / Cosine | 1.00E-02 | 86.16        | 80.15        | 76.03        | 61.52        | 66.94 |
|               | 1.00E-03 | <b>88.73</b> | 88.50        | 87.84        | 87.94        | 88.12 |
|               | 1.00E-04 | 87.47        | 87.47        | 87.35        | 87.07        | 87.49 |
|               | 1.00E-05 | 87.65        | 86.95        | 86.70        | 86.79        | 86.72 |
|               |          |              |              |              |              |       |
|               |          |              |              |              |              |       |
| PNASNet5      |          |              |              |              |              |       |
|               | lr \ wd  | 1.00E-03     | 1.00E-04     | 1.00E-05     | 1.00E-06     | 0     |
| SGD / Step    | 1.00E-01 | <b>86.87</b> | 85.84        | 86.50        | 86.14        | 86.14 |
|               | 1.00E-02 | 85.61        | 84.46        | 83.79        | 84.32        | 84.77 |
|               | 1.00E-03 | 82.83        | 82.55        | 82.92        | 82.59        | 82.87 |
|               | 1.00E-04 | 74.25        | 74.65        | 74.16        | 74.74        | 73.76 |
| SGD / Cosine  | 1.00E-01 | 85.79        | <b>86.68</b> | 86.59        | 86.38        | 86.64 |
|               | 1.00E-02 | 84.81        | 85.12        | 85.02        | 84.84        | 84.49 |
|               | 1.00E-03 | 82.29        | 82.45        | 82.59        | 82.92        | 82.45 |
|               | 1.00E-04 | 74.37        | 74.56        | 74.04        | 74.07        | 74.35 |
| Adam / Cosine | 1.00E-02 | 86.65        | 83.40        | 87.05        | <b>87.47</b> | 86.88 |
|               | 1.00E-03 | 86.67        | 86.98        | 86.95        | 86.93        | 87.40 |
|               | 1.00E-04 | 85.60        | 86.28        | 86.42        | 86.25        | 86.06 |
|               | 1.00E-05 | 82.49        | 84.64        | 84.57        | 84.62        | 84.71 |
|               |          |              |              |              |              |       |

|                   |          |              |              |          |          |       |
|-------------------|----------|--------------|--------------|----------|----------|-------|
|                   |          |              |              |          |          |       |
| Resnet152         |          |              |              |          |          |       |
|                   | lr \ wd  | 1.00E-03     | 1.00E-04     | 1.00E-05 | 1.00E-06 | 0     |
| SGD / Step        | 1.00E-01 | 81.29        | 81.24        | 73.01    | 77.08    | 74.77 |
|                   | 1.00E-02 | 85.35        | <b>86.12</b> | 85.44    | 85.82    | 85.19 |
|                   | 1.00E-03 | 85.56        | 85.37        | 84.98    | 85.40    | 85.16 |
|                   | 1.00E-04 | 78.62        | 78.86        | 78.90    | 78.86    | 78.57 |
| SGD / Cosine      | 1.00E-01 | 82.17        | 76.71        | 79.44    | 76.99    | 77.22 |
|                   | 1.00E-02 | <b>86.10</b> | 85.54        | 86.03    | 85.70    | 85.75 |
|                   | 1.00E-03 | 85.58        | 85.21        | 85.37    | 85.23    | 85.54 |
|                   | 1.00E-04 | 79.46        | 79.14        | 78.74    | 78.74    | 79.04 |
| Adam / Cosine     | 1.00E-02 | 84.26        | 83.24        | 85.20    | 84.94    | 84.05 |
|                   | 1.00E-03 | <b>87.75</b> | 87.49        | 87.33    | 87.51    | 87.51 |
|                   | 1.00E-04 | 87.19        | 86.53        | 86.58    | 86.21    | 86.79 |
|                   | 1.00E-05 | 86.21        | 86.11        | 86.16    | 86.42    | 86.37 |
|                   |          |              |              |          |          |       |
|                   |          |              |              |          |          |       |
|                   |          |              |              |          |          |       |
| MobileNetV3 Small |          |              |              |          |          |       |
|                   | lr \ wd  | 1.00E-03     | 1.00E-04     | 1.00E-05 | 1.00E-06 | 0     |
| SGD / Step        | 1.00E-01 | 84.45        | <b>85.27</b> | 84.99    | 84.90    | 84.90 |
|                   | 1.00E-02 | 84.69        | 84.45        | 84.62    | 84.57    | 84.57 |
|                   | 1.00E-03 | 84.10        | 83.94        | 83.63    | 83.63    | 83.77 |
|                   | 1.00E-04 | 73.25        | 72.64        | 73.11    | 73.07    | 72.50 |
| SGD / Cosine      | 1.00E-01 | <b>85.13</b> | 84.43        | 84.01    | 84.45    | 84.12 |
|                   | 1.00E-02 | 84.52        | 84.01        | 84.36    | 84.05    | 84.31 |
|                   | 1.00E-03 | 84.01        | 83.68        | 83.91    | 83.80    | 84.05 |
|                   | 1.00E-04 | 73.14        | 72.97        | 73.14    | 72.64    | 73.28 |
| Adam / Cosine     | 1.00E-02 | <b>85.81</b> | 85.62        | 85.29    | 85.34    | 85.71 |
|                   | 1.00E-03 | 84.80        | 83.56        | 84.17    | 84.12    | 84.15 |
|                   | 1.00E-04 | 68.86        | 84.78        | 84.48    | 84.43    | 84.76 |
|                   | 1.00E-05 | 62.03        | 80.80        | 81.65    | 81.23    | 80.92 |

|               |          |          |              |              |              |              |
|---------------|----------|----------|--------------|--------------|--------------|--------------|
|               |          |          |              |              |              |              |
|               |          |          |              |              |              |              |
| DeiT Tiny     |          |          |              |              |              |              |
|               | lr \ wd  | 1.00E-03 | 1.00E-04     | 1.00E-05     | 1.00E-06     | 0            |
| SGD / Step    | 1.00E-01 | 61.50    | 61.50        | 61.50        | 61.52        | 63.08        |
|               | 1.00E-02 | 84.93    | 84.46        | 84.51        | 84.49        | 84.86        |
|               | 1.00E-03 | 85.86    | 85.49        | 85.56        | <b>85.96</b> | 85.91        |
|               | 1.00E-04 | 84.18    | 84.21        | 83.53        | 84.14        | 84.21        |
| SGD / Cosine  | 1.00E-01 | 61.50    | 61.50        | 66.40        | 61.50        | 61.50        |
|               | 1.00E-02 | 84.44    | 84.44        | 84.21        | 83.88        | 84.35        |
|               | 1.00E-03 | 85.51    | <b>85.82</b> | 85.37        | 85.21        | 85.63        |
|               | 1.00E-04 | 83.60    | 83.43        | 84.25        | 83.90        | 83.81        |
| Adam / Cosine | 1.00E-02 | 66.85    | 62.87        | 61.66        | 62.33        | 62.73        |
|               | 1.00E-03 | 77.55    | 82.18        | 82.32        | 81.18        | 82.09        |
|               | 1.00E-04 | 81.93    | 85.88        | 85.85        | <b>86.04</b> | 85.76        |
|               | 1.00E-05 | 72.57    | 84.66        | 85.74        | 85.34        | 85.90        |
|               |          |          |              |              |              |              |
|               |          |          |              |              |              |              |
| DeiT Small    |          |          |              |              |              |              |
|               | lr \ wd  | 1.00E-03 | 1.00E-04     | 1.00E-05     | 1.00E-06     | 0            |
| SGD / Step    | 1.00E-01 | 0.00     | 0.00         | 61.50        | 61.50        | 0.00         |
|               | 1.00E-02 | 85.26    | 85.51        | 85.19        | 85.35        | 85.00        |
|               | 1.00E-03 | 85.98    | 86.64        | 86.61        | 86.75        | <b>87.06</b> |
|               | 1.00E-04 | 84.11    | 83.88        | 83.88        | 84.37        | 84.07        |
| SGD / Cosine  | 1.00E-01 | 61.52    | 0.00         | 61.50        | 0.00         | 64.21        |
|               | 1.00E-02 | 85.56    | 85.23        | 85.30        | 85.42        | 85.21        |
|               | 1.00E-03 | 86.50    | 86.19        | <b>86.68</b> | 86.29        | 86.21        |
|               | 1.00E-04 | 83.95    | 84.02        | 84.18        | 84.00        | 84.09        |
| Adam / Cosine | 1.00E-02 | 67.22    | 62.82        | 63.34        | 61.54        | 61.68        |
|               | 1.00E-03 | 78.63    | 81.79        | 82.74        | 82.18        | 81.53        |
|               | 1.00E-04 | 83.75    | 85.88        | 86.23        | 86.04        | 86.65        |

|                    |          |              |              |          |              |              |
|--------------------|----------|--------------|--------------|----------|--------------|--------------|
|                    | 1.00E-05 | 78.75        | 86.42        | 86.70    | <b>87.12</b> | 86.70        |
|                    |          |              |              |          |              |              |
|                    |          |              |              |          |              |              |
| ShuffleNet_V2_X0_5 |          |              |              |          |              |              |
|                    | lr \ wd  | 1.00E-03     | 1.00E-04     | 1.00E-05 | 1.00E-06     | 0            |
| SGD / Step         | 1.00E-01 | 84.12        | 85.15        | 85.18    | 85.36        | <b>85.43</b> |
|                    | 1.00E-02 | 82.93        | 82.39        | 82.49    | 82.42        | 82.42        |
|                    | 1.00E-03 | 61.52        | 61.52        | 61.52    | 61.52        | 61.52        |
|                    | 1.00E-04 | 61.52        | 61.52        | 61.52    | 61.52        | 61.52        |
| SGD / Cosine       | 1.00E-01 | 85.18        | <b>85.29</b> | 85.18    | 85.20        | 85.15        |
|                    | 1.00E-02 | 82.65        | 82.65        | 82.46    | 82.74        | 82.77        |
|                    | 1.00E-03 | 61.52        | 61.52        | 61.52    | 61.52        | 61.52        |
|                    | 1.00E-04 | 61.52        | 61.52        | 61.52    | 61.52        | 61.52        |
| Adam / Cosine      | 1.00E-02 | 84.94        | 85.50        | 85.27    | 85.25        | 85.53        |
|                    | 1.00E-03 | <b>85.64</b> | 85.18        | 85.13    | 84.36        | 84.19        |
|                    | 1.00E-04 | 82.98        | 81.20        | 80.90    | 80.87        | 80.66        |
|                    | 1.00E-05 | 61.94        | 65.91        | 65.65    | 65.96        | 65.49        |
|                    |          |              |              |          |              |              |
|                    |          |              |              |          |              |              |
| SqueezeNet1_1      |          |              |              |          |              |              |
|                    | lr \ wd  | 1.00E-03     | 1.00E-04     | 1.00E-05 | 1.00E-06     | 0            |
| SGD / Step         | 1.00E-01 | 5.07         | 5.07         | 5.07     | 5.07         | 5.07         |
|                    | 1.00E-02 | 79.42        | 5.07         | 82.53    | 81.37        | 79.54        |
|                    | 1.00E-03 | <b>84.45</b> | 84.24        | 83.68    | 83.87        | 84.12        |
|                    | 1.00E-04 | 78.84        | 78.23        | 79.31    | 78.12        | 79.24        |
| SGD / Cosine       | 1.00E-01 | 5.07         | 5.07         | 5.07     | 5.07         | 5.07         |
|                    | 1.00E-02 | 5.07         | 81.11        | 5.07     | 5.07         | 84.05        |
|                    | 1.00E-03 | 84.05        | 84.22        | 84.17    | 83.75        | <b>84.29</b> |
|                    | 1.00E-04 | 79.49        | 79.40        | 80.13    | 79.87        | 79.05        |
| Adam / Cosine      | 1.00E-02 | 70.77        | 70.24        | 68.62    | 61.52        | 61.52        |
|                    | 1.00E-03 | 72.06        | <b>85.15</b> | 85.08    | <b>85.15</b> | 84.59        |

|  |          |       |       |       |       |       |
|--|----------|-------|-------|-------|-------|-------|
|  | 1.00E-04 | 70.94 | 83.89 | 83.91 | 84.22 | 84.03 |
|  | 1.00E-05 | 62.31 | 77.06 | 79.35 | 77.76 | 79.03 |
