# Supplementary material
Source: ML conference proceedings conference paper supplement (https://openreview.net/forum?id=7T2XgpklLDA)
Supplement: supplementary_material [file attachment]

| ResNet 50 | SGD / Step    | ACC          |          |              |              |              | SGD / Step    | ROC      |          |               |               |               |
|-----------|---------------|--------------|----------|--------------|--------------|--------------|---------------|----------|----------|---------------|---------------|---------------|
|           | lr \ wd       | 1.00E-03     | 1.00E-04 | 1.00E-05     | 1.00E-06     | 0            | lr \ wd       | 1.00E-03 | 1.00E-04 | 1.00E-05      | 1.00E-06      | 0             |
|           | 1.00E-01      | 91.48        | 91.22    | 91.98        | 91.31        | 91.8         | 1.00E-01      | 0.8516   | 0.8495   | 0.8616        | 0.8002        | 0.8375        |
|           | 1.00E-02      | <b>94.56</b> | 94.28    | 94.51        | 94.32        | 94.36        | 1.00E-02      | 0.9279   | 0.9288   | 0.9244        | <b>0.9303</b> | 0.9295        |
|           | 1.00E-03      | 93.68        | 93.83    | 93.81        | 93.73        | 93.63        | 1.00E-03      | 0.9198   | 0.9141   | 0.9156        | 0.9172        | 0.9162        |
|           | 1.00E-04      | 92.15        | 92.14    | 92.18        | 92.19        | 92.16        | 1.00E-04      | 0.8668   | 0.8678   | 0.8607        | 0.8701        | 0.8687        |
|           | SGD / Cosine  |              |          |              |              |              | SGD / Cosine  |          |          |               |               |               |
|           | 1.00E-01      | 92.31        | 91.19    | 91.46        | 91.84        | 89.35        | 1.00E-01      | 0.8736   | 0.8416   | 0.8537        | 0.853         | 0.8364        |
|           | 1.00E-02      | 94.29        | 94.19    | <b>94.47</b> | 94.38        | 94.42        | 1.00E-02      | 0.927    | 0.9229   | <b>0.9311</b> | 0.9253        | 0.9293        |
|           | 1.00E-03      | 93.62        | 93.8     | 93.69        | 93.84        | 93.75        | 1.00E-03      | 0.9179   | 0.9164   | 0.917         | 0.9198        | 0.9154        |
|           | 1.00E-04      | 92.37        | 92.06    | 92.18        | 92.25        | 92.14        | 1.00E-04      | 0.8689   | 0.8676   | 0.8645        | 0.8659        | 0.8545        |
|           | Adam / Cosine |              |          |              |              |              | Adam / Cosine |          |          |               |               |               |
|           | 1.00E-02      | 92.29        | 92.11    | 92.10        | 92.24        | 92.16        | 1.00E-02      | 0.8725   | 0.8779   | 0.8772        | 0.8711        | 0.8766        |
|           | 1.00E-03      | 92.31        | 92.69    | 92.81        | 92.81        | 92.84        | 1.00E-03      | 0.8880   | 0.8976   | 0.8959        | 0.8987        | 0.9039        |
|           | 1.00E-04      | 93.99        | 95.08    | 95.26        | 95.29        | <b>95.34</b> | 1.00E-04      | 0.9376   | 0.9480   | <b>0.9524</b> | 0.9513        | 0.9512        |
|           | 1.00E-05      | 93.42        | 94.59    | 94.80        | 94.52        | 94.58        | 1.00E-05      | 0.9169   | 0.9357   | 0.9371        | 0.9336        | 0.9341        |
| AlexNet   | SGD / Step    |              |          |              |              |              | SGD / Step    |          |          |               |               |               |
|           | lr \ wd       | 1.00E-03     | 1.00E-04 | 1.00E-05     | 1.00E-06     | 0            | lr \ wd       | 1.00E-03 | 1.00E-04 | 1.00E-05      | 1.00E-06      | 0             |
|           | 1.00E-01      | 0            | 0        | 0            | 0            | 0            | 1.00E-01      | 0        | 0        | 0             | 0             | 0             |
|           | 1.00E-02      | 92.95        | 93.13    | <b>93.17</b> | 93.12        | 93.14        | 1.00E-02      | 0.9023   | 0.9044   | <b>0.9074</b> | 0.9065        | 0.9068        |
|           | 1.00E-03      | 92.93        | 92.91    | 93.09        | 93.12        | 93.12        | 1.00E-03      | 0.8994   | 0.8978   | 0.8984        | 0.9008        | 0.9018        |
|           | 1.00E-04      | 92.46        | 92.47    | 92.49        | 92.46        | 92.37        | 1.00E-04      | 0.8691   | 0.8685   | 0.8627        | 0.8731        | 0.8647        |
|           | SGD / Cosine  |              |          |              |              |              | SGD / Cosine  |          |          |               |               |               |
|           | 1.00E-01      | 0            | 0        | 0            | 0            | 0            | 1.00E-01      | 0        | 0        | 0             | 0             | 0             |
|           | 1.00E-02      | 92.66        | 93.07    | 93.07        | 93.09        | <b>93.19</b> | 1.00E-02      | 0.8931   | 0.905    | 0.9124        | 0.9076        | <b>0.9126</b> |
|           | 1.00E-03      | 93.04        | 93.12    | 93.13        | 93           | 93           | 1.00E-03      | 0.8989   | 0.8983   | 0.8992        | 0.8996        | 0.8994        |
|           | 1.00E-04      | 92.4         | 92.49    | 92.38        | 92.43        | 92.53        | 1.00E-04      | 0.8669   | 0.8697   | 0.8698        | 0.8673        | 0.8652        |
|           | Adam / Cosine |              |          |              |              |              | Adam / Cosine |          |          |               |               |               |
|           | 1.00E-02      | 91.22        | 91.22    | 91.22        | 91.22        | 91.22        | 1.00E-02      | 0.5000   | 0.5003   | 0.5000        | 0.5000        | 0.6797        |
|           | 1.00E-03      | 92.32        | 91.22    | 91.22        | 91.22        | 92.59        | 1.00E-03      | 0.8747   | 0.5000   | 0.5000        | 0.5000        | 0.8996        |
|           | 1.00E-04      | 92.94        | 93.81    | 93.74        | <b>93.93</b> | 93.62        | 1.00E-04      | 0.9082   | 0.9280   | 0.9254        | <b>0.9283</b> | 0.9263        |
|           | 1.00E-05      | 92.64        | 93.36    | 93.33        | 93.32        | 93.44        | 1.00E-05      | 0.8817   | 0.9127   | 0.8961        | 0.9078        | 0.9021        |
| VGG13BN   | SGD / Step    |              |          |              |              |              | SGD / Step    |          |          |               |               |               |
|           | lr \ wd       | 1.00E-03     | 1.00E-04 | 1.00E-05     | 1.00E-06     | 0            | lr \ wd       | 1.00E-03 | 1.00E-04 | 1.00E-05      | 1.00E-06      | 0             |
|           | 1.00E-01      | 92.29        | 92.34    | 92.27        | 0            | 92.31        | 1.00E-01      | 0.8774   | 0.8822   | 0.8829        | 0             | 0.8831        |
|           | 1.00E-02      | 94.23        | 94.2     | 94.37        | 94.24        | <b>94.5</b>  | 1.00E-02      | 0.9333   | 0.9296   | 0.9342        | <b>0.9343</b> | 0.9331        |
|           | 1.00E-03      | 93.51        | 93.4     | 93.44        | 93.43        | 93.4         | 1.00E-03      | 0.9143   | 0.9126   | 0.9138        | 0.916         | 0.9136        |
|           | 1.00E-04      | 92.18        | 92.35    | 92.34        | 92.36        | 92.33        | 1.00E-04      | 0.8781   | 0.8768   | 0.8758        | 0.8767        | 0.8742        |
|           | SGD / Cosine  |              |          |              |              |              | SGD / Cosine  |          |          |               |               |               |
|           | 1.00E-01      | 92.36        | 92.48    | 92.5         | 92.3         | 92.19        | 1.00E-01      | 0.8869   | 0.8921   | 0.8912        | 0.8832        | 0.8798        |
|           | 1.00E-02      | <b>94.5</b>  | 94.26    | 94.19        | 94.41        | 94.34        | 1.00E-02      | 0.9349   | 0.9362   | <b>0.9364</b> | 0.9342        | 0.9362        |
|           | 1.00E-03      | 93.47        | 93.44    | 93.41        | 93.33        | 93.39        | 1.00E-03      | 0.9116   | 0.9148   | 0.9132        | 0.9149        | 0.9154        |
|           | 1.00E-04      | 92.31        | 92.34    | 92.3         | 92.2         | 92.29        | 1.00E-04      | 0.8738   | 0.8734   | 0.8773        | 0.8772        | 0.876         |
|           | Adam / Cosine |              |          |              |              |              | Adam / Cosine |          |          |               |               |               |
|           | 1.00E-02      | 91.74        | 91.22    | 91.22        | 91.22        | 91.22        | 1.00E-02      | 0.8698   | 0.5441   | 0.5528        | 0.6266        | 0.5941        |

|                |               |          |              |          |              |              |               |          |               |               |               |               |
|----------------|---------------|----------|--------------|----------|--------------|--------------|---------------|----------|---------------|---------------|---------------|---------------|
|                | 1.00E-03      | 92.40    | 92.44        | 93.00    | 93.06        | 93.00        | 1.00E-03      | 0.8911   | 0.8974        | 0.9161        | 0.9141        | 0.9145        |
|                | 1.00E-04      | 94.92    | 95.01        | 94.96    | 94.74        | <b>95.07</b> | 1.00E-04      | 0.9521   | <b>0.9529</b> | 0.9509        | 0.9479        | 0.9499        |
|                | 1.00E-05      | 94.12    | 94.14        | 94.05    | 94.00        | 94.08        | 1.00E-05      | 0.9421   | 0.9373        | 0.9363        | 0.9368        | 0.9383        |
| PNASNet5       | SGD / Step    |          |              |          |              |              | SGD / Step    |          |               |               |               |               |
|                | lr \ wd       | 1.00E-03 | 1.00E-04     | 1.00E-05 | 1.00E-06     | 0            | lr \ wd       | 1.00E-03 | 1.00E-04      | 1.00E-05      | 1.00E-06      | 0             |
|                | 1.00E-01      | 92.93    | 94.92        | 94.84    | 94.67        | <b>95.01</b> | 1.00E-01      | 0.904    | <b>0.9441</b> | 0.9426        | 0.9395        | 0.9373        |
|                | 1.00E-02      | 94.51    | 94.42        | 94.33    | 94.46        | 94.38        | 1.00E-02      | 0.9341   | 0.931         | 0.9297        | 0.9246        | 0.9297        |
|                | 1.00E-03      | 93.16    | 93.02        | 92.95    | 93.12        | 93.12        | 1.00E-03      | 0.8969   | 0.8908        | 0.8935        | 0.8959        | 0.8948        |
|                | 1.00E-04      | 91.64    | 91.59        | 91.68    | 91.74        | 91.65        | 1.00E-04      | 0.828    | 0.8272        | 0.8263        | 0.8253        | 0.8319        |
|                | SGD / Cosine  |          |              |          |              |              | SGD / Cosine  |          |               |               |               |               |
|                | 1.00E-01      | 93.45    | 94.98        | 95.1     | <b>95.16</b> | 95.06        | 1.00E-01      | 0.9126   | 0.9445        | 0.9393        | <b>0.9449</b> | 0.9365        |
|                | 1.00E-02      | 94.4     | 94.47        | 94.33    | 94.19        | 94.53        | 1.00E-02      | 0.9316   | 0.933         | 0.9316        | 0.932         | 0.929         |
|                | 1.00E-03      | 93.13    | 93.14        | 92.98    | 93.05        | 93.14        | 1.00E-03      | 0.8933   | 0.8934        | 0.8928        | 0.8904        | 0.8918        |
|                | 1.00E-04      | 91.63    | 91.61        | 91.58    | 91.64        | 91.77        | 1.00E-04      | 0.8265   | 0.8242        | 0.8213        | 0.8289        | 0.825         |
|                | Adam / Cosine |          |              |          |              |              | Adam / Cosine |          |               |               |               |               |
|                | 1.00E-02      | 92.53    | 92.37        | 92.56    | 91.96        | 92.31        | 1.00E-02      | 0.8876   | 0.8962        | 0.8872        | 0.8587        | 0.8847        |
|                | 1.00E-03      | 93.05    | 94.54        | 94.74    | 94.37        | 94.66        | 1.00E-03      | 0.9209   | 0.9456        | 0.9459        | 0.9448        | 0.9465        |
|                | 1.00E-04      | 93.49    | 96.01        | 95.90    | 95.87        | <b>96.05</b> | 1.00E-04      | 0.9147   | 0.9525        | <b>0.9572</b> | 0.9553        | 0.9560        |
|                | 1.00E-05      | 92.87    | 94.32        | 94.42    | 94.41        | 94.44        | 1.00E-05      | 0.8912   | 0.9353        | 0.9342        | 0.9310        | 0.9350        |
| Resnet152      | SGD / Step    |          |              |          |              |              | SGD / Step    |          |               |               |               |               |
|                | lr \ wd       | 1.00E-03 | 1.00E-04     | 1.00E-05 | 1.00E-06     | 0            | lr \ wd       | 1.00E-03 | 1.00E-04      | 1.00E-05      | 1.00E-06      | 0             |
|                | 1.00E-01      | 92.1     | 91.83        | 91.76    | 91.8         | 91.74        | 1.00E-01      | 0.8652   | 0.8508        | 0.8428        | 0.8532        | 0.8414        |
|                | 1.00E-02      | 94.5     | <b>94.62</b> | 94.53    | 94.44        | 94.61        | 1.00E-02      | 0.9309   | 0.9306        | <b>0.9336</b> | 0.9301        | 0.9312        |
|                | 1.00E-03      | 93.66    | 93.77        | 93.68    | 93.75        | 93.86        | 1.00E-03      | 0.9159   | 0.9216        | 0.9201        | 0.9199        | 0.9192        |
|                | 1.00E-04      | 92.44    | 92.26        | 92.51    | 92.36        | 92.43        | 1.00E-04      | 0.8698   | 0.8658        | 0.8721        | 0.8678        | 0.8535        |
|                | SGD / Cosine  |          |              |          |              |              | SGD / Cosine  |          |               |               |               |               |
|                | 1.00E-01      | 92.15    | 91.69        | 91.89    | 92.18        | 91.61        | 1.00E-01      | 0.8715   | 0.8461        | 0.8579        | 0.8666        | 0.8445        |
|                | 1.00E-02      | 94.68    | 94.11        | 94.42    | 94           | <b>94.86</b> | 1.00E-02      | 0.9303   | 0.9277        | 0.9332        | 0.93          | <b>0.9337</b> |
|                | 1.00E-03      | 93.81    | 93.71        | 93.64    | 93.69        | 93.71        | 1.00E-03      | 0.9209   | 0.9195        | 0.921         | 0.9201        | 0.9223        |
|                | 1.00E-04      | 92.42    | 92.39        | 92.37    | 92.51        | 92.36        | 1.00E-04      | 0.8722   | 0.8761        | 0.8691        | 0.8699        | 0.8639        |
|                | Adam / Cosine |          |              |          |              |              | Adam / Cosine |          |               |               |               |               |
|                | 1.00E-02      | 92.33    | 92.24        | 92.38    | 92.14        | 92.05        | 1.00E-02      | 0.8716   | 0.8829        | 0.8730        | 0.8713        | 0.8798        |
|                | 1.00E-03      | 92.49    | 92.77        | 92.75    | 92.73        | 92.75        | 1.00E-03      | 0.8855   | 0.8982        | 0.8943        | 0.8949        | 0.9020        |
|                | 1.00E-04      | 94.13    | 95.21        | 95.28    | 95.20        | <b>95.49</b> | 1.00E-04      | 0.9370   | 0.9551        | 0.9535        | <b>0.9562</b> | 0.9549        |
|                | 1.00E-05      | 93.34    | 94.95        | 94.73    | 94.94        | 94.77        | 1.00E-05      | 0.9229   | 0.9418        | 0.9402        | 0.9400        | 0.9453        |
| MobileNetV3 Sm | SGD / Step    |          |              |          |              |              | SGD / Step    |          |               |               |               |               |
|                | lr \ wd       | 1.00E-03 | 1.00E-04     | 1.00E-05 | 1.00E-06     | 0            | lr \ wd       | 1.00E-03 | 1.00E-04      | 1.00E-05      | 1.00E-06      | 0             |
|                | 1.00E-01      | 92.22    | 93.78        | 94.04    | 94.02        | 93.69        | 1.00E-01      | 0.8868   | 0.9275        | 0.9349        | 0.9321        | 0.9293        |
|                | 1.00E-02      | 93.89    | 94.01        | 93.95    | <b>94.14</b> | 94.06        | 1.00E-02      | 0.9338   | 0.933         | 0.9335        | <b>0.9354</b> | 0.9307        |
|                | 1.00E-03      | 93.17    | 92.96        | 93.04    | 92.94        | 93.14        | 1.00E-03      | 0.9017   | 0.8944        | 0.8966        | 0.8968        | 0.8993        |
|                | 1.00E-04      | 91.82    | 92.05        | 91.97    | 92.19        | 91.85        | 1.00E-04      | 0.8333   | 0.8487        | 0.8409        | 0.8531        | 0.8439        |
|                | SGD / Cosine  |          |              |          |              |              | SGD / Cosine  |          |               |               |               |               |
|                | 1.00E-01      | 92.49    | 93.78        | 93.73    | 94.1         | <b>94.4</b>  | 1.00E-01      | 0.8962   | 0.9312        | 0.9278        | 0.9299        | <b>0.9393</b> |
|                | 1.00E-02      | 93.62    | 94.01        | 93.86    | 94.04        | 93.95        | 1.00E-02      | 0.9321   | 0.9347        | 0.9271        | 0.9296        | 0.9332        |
|                | 1.00E-03      | 92.92    | 93.08        | 93.03    | 93.1         | 93.06        | 1.00E-03      | 0.8999   | 0.899         | 0.8966        | 0.8994        | 0.8991        |

|                 |               |          |              |          |              |              |               |              |               |               |               |               |
|-----------------|---------------|----------|--------------|----------|--------------|--------------|---------------|--------------|---------------|---------------|---------------|---------------|
|                 | 1.00E-04      | 92.04    | 91.98        | 92.15    | 91.88        | 91.91        | 1.00E-04      | 0.8513       | 0.8471        | 0.8479        | 0.8384        | 0.8547        |
|                 | Adam / Cosine |          |              |          |              |              | Adam / Cosine |              |               |               |               |               |
|                 | 1.00E-02      | 92.4     | 92.97        | 92.67    | 93.09        | 92.87        | 1.00E-02      | 0.8944       | 0.9143        | 0.9042        | 0.9146        | 0.9078        |
|                 | 1.00E-03      | 92.69    | 94.5         | 94.62    | <b>94.69</b> | 94.49        | 1.00E-03      | 0.908        | 0.9418        | <b>0.9455</b> | 0.9452        | 0.944         |
|                 | 1.00E-04      | 92.09    | 94.33        | 94.16    | 94.24        | 94.08        | 1.00E-04      | 0.8664       | 0.9372        | 0.9326        | 0.9308        | 0.9302        |
|                 | 1.00E-05      | 91.22    | 92.59        | 92.64    | 92.58        | 92.61        | 1.00E-05      | 0.8526       | 0.8938        | 0.8961        | 0.8905        | 0.8896        |
| DeiT Tiny       | SGD / Step    |          |              |          |              |              | SGD / Step    |              |               |               |               |               |
|                 | lr \ wd       | 1.00E-03 | 1.00E-04     | 1.00E-05 | 1.00E-06     | 0            | lr \ wd       | 1.00E-03     | 1.00E-04      | 1.00E-05      | 1.00E-06      | 0             |
|                 | 1.00E-01      | 91.34    | 0            | 91.41    | 0            | 91.22        | 1.00E-01      | 0.7999       | 0             | 0.7918        | 0             | 0.8127        |
|                 | 1.00E-02      | 94.46    | 94.44        | 94.51    | 94.46        | 94.57        | 1.00E-02      | 0.94         | 0.9381        | 0.9381        | 0.9367        | <b>0.9406</b> |
|                 | 1.00E-03      | 94.49    | 94.42        | 94.44    | <b>94.62</b> | 94.34        | 1.00E-03      | 0.9354       | 0.9386        | 0.9368        | 0.9355        | 0.9328        |
|                 | 1.00E-04      | 92.93    | 92.76        | 92.87    | 92.91        | 93.05        | 1.00E-04      | 0.8928       | 0.8881        | 0.8966        | 0.8927        | 0.8945        |
|                 | SGD / Cosine  |          |              |          |              |              | SGD / Cosine  |              |               |               |               |               |
|                 | 1.00E-01      | 91.3     | 0            | 91.32    | 91.22        | 0            | 1.00E-01      | 0.815        | 0             | 0.792         | 0.7564        | 0             |
|                 | 1.00E-02      | 94.28    | 94.32        | 94.63    | 94.34        | <b>94.66</b> | 1.00E-02      | 0.9293       | 0.9328        | <b>0.9392</b> | 0.9349        | 0.9356        |
|                 | 1.00E-03      | 94.37    | 94.43        | 94.32    | 94.32        | 94.31        | 1.00E-03      | 0.9374       | 0.9348        | 0.9372        | 0.9346        | 0.9349        |
|                 | 1.00E-04      | 92.98    | 93.09        | 93.04    | 93.05        | 92.97        | 1.00E-04      | 0.8899       | 0.894         | 0.8944        | 0.8933        | 0.8919        |
|                 | Adam / Cosine |          |              |          |              |              | Adam / Cosine |              |               |               |               |               |
|                 | 1.00E-02      | 92.19    | 92.2         | 91.44    | 91.61        | 91.87        | 1.00E-02      | 0.8606       | 0.8496        | 0.8132        | 0.8249        | 0.8245        |
|                 | 1.00E-03      | 92.66    | 93.13        | 92.93    | 92.95        | 92.84        | 1.00E-03      | 0.8819       | 0.9036        | 0.9006        | 0.8969        | 0.9020        |
|                 | 1.00E-04      | 92.53    | 95.11        | 95.26    | <b>95.38</b> | 95.12        | 1.00E-04      | 0.8731       | 0.9509        | <b>0.9510</b> | 0.9509        | 0.9501        |
|                 | 1.00E-05      | 91.29    | 94.06        | 94.48    | 94.46        | 94.56        | 1.00E-05      | 0.8558       | 0.9305        | 0.9385        | 0.9335        | 0.9359        |
| DeiT Small      | SGD / Step    |          |              |          |              |              | SGD / Step    |              |               |               |               |               |
|                 | lr \ wd       | 1.00E-03 | 1.00E-04     | 1.00E-05 | 1.00E-06     | 0            | lr \ wd       | 1.00E-03     | 1.00E-04      | 1.00E-05      | 1.00E-06      | 0             |
|                 | 1.00E-01      | 0        | 0            | 91.39    | 0            | 0            | 1.00E-01      | 0            | 0             | 0.8113        | 0             | 0             |
|                 | 1.00E-02      | 94.89    | <b>95.06</b> | 94.98    | 94.82        | 94.99        | 1.00E-02      | 0.944        | 0.9426        | <b>0.9451</b> | 0.9407        | 0.9439        |
|                 | 1.00E-03      | 94.45    | 94.59        | 94.34    | 94.38        | 94.33        | 1.00E-03      | 0.9372       | 0.935         | 0.9336        | 0.9346        | 0.9282        |
|                 | 1.00E-04      | 92.71    | 92.53        | 92.7     | 92.62        | 92.48        | 1.00E-04      | 0.8902       | 0.8798        | 0.8802        | 0.8833        | 0.8693        |
|                 | SGD / Cosine  |          |              |          |              |              | SGD / Cosine  |              |               |               |               |               |
|                 | 1.00E-01      | 0        | 0            | 0        | 0            | 91.22        | 1.00E-01      | 0            | 0             | 0             | 0             | 0.626         |
|                 | 1.00E-02      | 95.02    | 95.17        | 94.5     | 94.79        | <b>95.23</b> | 1.00E-02      | <b>0.944</b> | 0.9433        | 0.9355        | 0.9391        | 0.9438        |
|                 | 1.00E-03      | 94.44    | 94.59        | 94.44    | 94.58        | 94.44        | 1.00E-03      | 0.9365       | 0.9341        | 0.9309        | 0.9344        | 0.93          |
|                 | 1.00E-04      | 92.52    | 92.57        | 92.54    | 92.69        | 92.63        | 1.00E-04      | 0.8822       | 0.8874        | 0.8791        | 0.8905        | 0.885         |
|                 | Adam / Cosine |          |              |          |              |              | Adam / Cosine |              |               |               |               |               |
|                 | 1.00E-02      | 92.36    | 91.70        | 91.68    | 91.36        | 91.25        | 1.00E-02      | 0.8745       | 0.8251        | 0.8245        | 0.8083        | 0.8173        |
|                 | 1.00E-03      | 92.59    | 93.10        | 92.86    | 93.05        | 93.30        | 1.00E-03      | 0.8882       | 0.9064        | 0.8993        | 0.9069        | 0.9047        |
|                 | 1.00E-04      | 92.79    | 95.92        | 95.96    | 95.91        | <b>96.16</b> | 1.00E-04      | 0.8960       | 0.9548        | 0.9579        | <b>0.9583</b> | 0.9571        |
|                 | 1.00E-05      | 92.43    | 94.66        | 95.17    | 95.06        | 95.14        | 1.00E-05      | 0.8737       | 0.9390        | 0.9479        | 0.9490        | 0.9461        |
| ShuffleNet_V2_X | lr \ wd       | 1.00E-03 | 1.00E-04     | 1.00E-05 | 1.00E-06     | 0            | lr \ wd       | 1.00E-03     | 1.00E-04      | 1.00E-05      | 1.00E-06      | 0             |
| SGD / Step      | 1.00E-01      | 92.83    | 93.36        | 93.56    | 93.41        | <b>93.58</b> | 1.00E-01      | 0.8997       | 0.9200        | 0.9232        | 0.9212        | <b>0.9251</b> |
|                 | 1.00E-02      | 92.77    | 92.89        | 92.87    | 92.78        | 92.91        | 1.00E-02      | 0.9108       | 0.9066        | 0.9062        | 0.9072        | 0.9049        |
|                 | 1.00E-03      | 91.22    | 91.22        | 91.22    | 91.22        | 91.22        | 1.00E-03      | 0.8457       | 0.8433        | 0.8430        | 0.8454        | 0.8449        |
|                 | 1.00E-04      | 91.22    | 91.22        | 91.22    | 91.22        | 91.22        | 1.00E-04      | 0.4437       | 0.4778        | 0.4942        | 0.4842        | 0.4567        |
| SGD / Cosine    | 1.00E-01      | 93.11    | 93.64        | 93.68    | <b>93.70</b> | 93.53        | 1.00E-01      | 0.9147       | <b>0.9267</b> | 0.9251        | 0.9262        | 0.9257        |
|                 | 1.00E-02      | 92.89    | 92.89        | 92.83    | 92.87        | 92.84        | 1.00E-02      | 0.9113       | 0.9070        | 0.9077        | 0.9074        | 0.9081        |

|                       |          |              |              |              |              |              |          |          |               |          |        |               |
|-----------------------|----------|--------------|--------------|--------------|--------------|--------------|----------|----------|---------------|----------|--------|---------------|
|                       | 1.00E-03 | 91.22        | 91.22        | 91.22        | 91.22        | 91.22        | 1.00E-03 | 0.8468   | 0.8422        | 0.8419   | 0.8451 | 0.8436        |
|                       | 1.00E-04 | 91.22        | 91.22        | 91.22        | 91.22        | 91.22        | 1.00E-04 | 0.5189   | 0.4716        | 0.4950   | 0.5757 | 0.4961        |
| Adam / Cosine         | 1.00E-02 | 92.52        | 92.62        | 92.80        | 92.80        | 92.77        | 1.00E-02 | 0.8936   | 0.8992        | 0.9039   | 0.9062 | 0.9039        |
|                       | 1.00E-03 | 93.58        | 93.69        | 93.76        | <b>93.78</b> | 93.73        | 1.00E-03 | 0.9243   | 0.9251        | 0.9259   | 0.9274 | <b>0.9289</b> |
|                       | 1.00E-04 | 93.32        | 93.00        | 93.05        | 93.05        | 93.08        | 1.00E-04 | 0.9221   | 0.9114        | 0.9121   | 0.9111 | 0.9137        |
|                       | 1.00E-05 | 91.22        | 91.22        | 91.22        | 91.22        | 91.22        | 1.00E-05 | 0.8631   | 0.8556        | 0.8571   | 0.8606 | 0.8584        |
| SqueezeNet1_1 lr \ wd | 1.00E-03 | 1.00E-04     | 1.00E-05     | 1.00E-06     | 0            | lr \ wd      | 1.00E-03 | 1.00E-04 | 1.00E-05      | 1.00E-06 | 0      | 0             |
| SGD / Step            | 1.00E-01 | 91.22        | 91.22        | 91.22        | 91.22        | 91.22        | 1.00E-01 | 0.0000   | 0.0000        | 0.0000   | 0.0000 | 0.0000        |
|                       | 1.00E-02 | 92.34        | 92.45        | 92.54        | 92.49        | 92.44        | 1.00E-02 | 0.8741   | 0.8812        | 0.8855   | 0.8850 | 0.8850        |
|                       | 1.00E-03 | <b>92.99</b> | 92.92        | 92.89        | 92.98        | 92.87        | 1.00E-03 | 0.8883   | <b>0.8989</b> | 0.8805   | 0.8979 | 0.8913        |
|                       | 1.00E-04 | 92.59        | 92.58        | 92.44        | 92.56        | 92.31        | 1.00E-04 | 0.8492   | 0.8601        | 0.8601   | 0.8630 | 0.8605        |
| SGD / Cosine          | 1.00E-01 | 91.22        | 91.22        | 91.22        | 91.22        | 91.22        | 1.00E-01 | 0.0000   | 0.0000        | 0.0000   | 0.0000 | 0.0000        |
|                       | 1.00E-02 | 92.80        | 91.22        | 92.60        | 92.96        | 92.99        | 1.00E-02 | 0.8991   | 0.0000        | 0.8857   | 0.9033 | <b>0.9063</b> |
|                       | 1.00E-03 | 93.12        | <b>93.21</b> | 93.06        | 92.83        | 92.75        | 1.00E-03 | 0.8971   | 0.8892        | 0.8966   | 0.8930 | 0.8854        |
|                       | 1.00E-04 | 92.45        | 92.47        | 92.51        | 92.40        | 92.33        | 1.00E-04 | 0.8412   | 0.8360        | 0.8493   | 0.7920 | 0.8362        |
| Adam / Cosine         | 1.00E-02 | 91.22        | 91.22        | 91.22        | 91.23        | 91.22        | 1.00E-02 | 0.7872   | 0.5026        | 0.7567   | 0.7886 | 0.5000        |
|                       | 1.00E-03 | 91.96        | 92.46        | 92.40        | 92.58        | 92.61        | 1.00E-03 | 0.8724   | 0.8917        | 0.8931   | 0.8963 | 0.8973        |
|                       | 1.00E-04 | 91.52        | 93.12        | <b>93.37</b> | 93.16        | <b>93.37</b> | 1.00E-04 | 0.8643   | <b>0.9073</b> | 0.9037   | 0.9033 | 0.9038        |
|                       | 1.00E-05 | 91.22        | 92.63        | 92.62        | 92.80        | 92.57        | 1.00E-05 | 0.8536   | 0.8787        | 0.8427   | 0.8741 | 0.8608        |
