# Supplementary material
Source: ML conference proceedings conference paper supplement (https://openreview.net/forum?id=7T2XgpklLDA)
Supplement: supplementary_material [file attachment]

|               |          |               |               |               |               |        |
|---------------|----------|---------------|---------------|---------------|---------------|--------|
| ResNet 50     |          |               |               |               |               |        |
|               | lr \ wd  | 1.00E-03      | 1.00E-04      | 1.00E-05      | 1.00E-06      | 0      |
| SGD / Step    | 1.00E-01 | 0.6915        | 0.6641        | 0.6376        | 0.7748        | 0.6730 |
|               | 1.00E-02 | 0.9019        | 0.9050        | <b>0.9204</b> | 0.9128        | 0.9165 |
|               | 1.00E-03 | 0.8958        | 0.8993        | 0.8909        | 0.8891        | 0.8983 |
|               | 1.00E-04 | 0.7422        | 0.7663        | 0.7670        | 0.7747        | 0.7721 |
| SGD / Cosine  | 1.00E-01 | 0.6588        | 0.6160        | 0.6400        | 0.7059        | 0.6924 |
|               | 1.00E-02 | <b>0.9191</b> | 0.9067        | 0.9137        | 0.9181        | 0.9121 |
|               | 1.00E-03 | 0.8900        | 0.8916        | 0.8888        | 0.8924        | 0.8863 |
|               | 1.00E-04 | 0.7585        | 0.7485        | 0.7326        | 0.7453        | 0.7388 |
| Adam / Cosine | 1.00E-02 | 0.6821        | 0.6998        | 0.7048        | 0.6930        | 0.7034 |
|               | 1.00E-03 | 0.9106        | 0.9025        | <b>0.9215</b> | 0.9135        | 0.9129 |
|               | 1.00E-04 | 0.9074        | 0.9140        | 0.9195        | 0.9205        | 0.9203 |
|               | 1.00E-05 | 0.9021        | 0.9026        | 0.8978        | 0.8982        | 0.9013 |
|               |          |               |               |               |               |        |
|               |          |               |               |               |               |        |
| AlexNet       |          |               |               |               |               |        |
|               | lr \ wd  | 1.00E-03      | 1.00E-04      | 1.00E-05      | 1.00E-06      | 0      |
| SGD / Step    | 1.00E-01 | 0.0000        | 0.0000        | 0.0000        | 0.0000        | 0.0000 |
|               | 1.00E-02 | 0.0000        | 0.0000        | 0.0000        | 0.0000        | 0.0000 |
|               | 1.00E-03 | 0.8090        | <b>0.8502</b> | 0.8404        | 0.8333        | 0.8384 |
|               | 1.00E-04 | 0.8060        | 0.7845        | 0.7868        | 0.7897        | 0.7830 |
| SGD / Cosine  | 1.00E-01 | 0.0000        | 0.0000        | 0.0000        | 0.0000        | 0.0000 |
|               | 1.00E-02 | 0.0000        | 0.0000        | 0.0000        | 0.6036        | 0.0000 |
|               | 1.00E-03 | 0.8375        | 0.8401        | <b>0.8494</b> | 0.8080        | 0.8300 |
|               | 1.00E-04 | 0.7751        | 0.7958        | 0.7826        | 0.7928        | 0.7901 |
| Adam / Cosine | 1.00E-02 | 0.0000        | 0.0128        | 0.0000        | 0.0000        | 0.0069 |
|               | 1.00E-03 | 0.7342        | 0.7410        | 0.0000        | 0.7842        | 0.7536 |
|               | 1.00E-04 | 0.8918        | 0.8925        | 0.8810        | <b>0.8945</b> | 0.8835 |
|               | 1.00E-05 | 0.8116        | 0.8349        | 0.8460        | 0.8541        | 0.8430 |
|               |          |               |               |               |               |        |
|               |          |               |               |               |               |        |

|               |          |               |               |          |               |               |
|---------------|----------|---------------|---------------|----------|---------------|---------------|
| VGG13BN       |          |               |               |          |               |               |
|               | lr \ wd  | 1.00E-03      | 1.00E-04      | 1.00E-05 | 1.00E-06      | 0             |
| SGD / Step    | 1.00E-01 | 0.8241        | 0.6866        | 0.8518   | 0.8336        | 0.7386        |
|               | 1.00E-02 | 0.9147        | 0.9169        | 0.9131   | <b>0.9182</b> | 0.9115        |
|               | 1.00E-03 | 0.8848        | 0.8922        | 0.8850   | 0.8944        | 0.8887        |
|               | 1.00E-04 | 0.7763        | 0.7793        | 0.7779   | 0.7802        | 0.7799        |
| SGD / Cosine  | 1.00E-01 | 0.6984        | 0.8022        | 0.6942   | 0.8681        | 0.8727        |
|               | 1.00E-02 | 0.9119        | 0.9137        | 0.9127   | 0.9172        | <b>0.9265</b> |
|               | 1.00E-03 | 0.8834        | 0.8817        | 0.8827   | 0.8791        | 0.8857        |
|               | 1.00E-04 | 0.7701        | 0.7762        | 0.7680   | 0.7641        | 0.7680        |
| Adam / Cosine | 1.00E-02 | 0.5905        | 0.6594        | 0.6187   | 0.5898        | 0.4598        |
|               | 1.00E-03 | 0.8998        | 0.9096        | 0.9235   | 0.9096        | 0.9220        |
|               | 1.00E-04 | 0.9172        | 0.9225        | 0.9202   | 0.9145        | <b>0.9268</b> |
|               | 1.00E-05 | 0.9005        | 0.8967        | 0.9064   | 0.9056        | 0.9116        |
|               |          |               |               |          |               |               |
|               |          |               |               |          |               |               |
| PNASNet5      |          |               |               |          |               |               |
|               | lr \ wd  | 1.00E-03      | 1.00E-04      | 1.00E-05 | 1.00E-06      | 0             |
| SGD / Step    | 1.00E-01 | 0.9244        | 0.9193        | 0.9127   | 0.9233        | <b>0.9271</b> |
|               | 1.00E-02 | 0.9043        | 0.9073        | 0.9068   | 0.9028        | 0.8930        |
|               | 1.00E-03 | 0.8757        | 0.8749        | 0.8686   | 0.8689        | 0.8695        |
|               | 1.00E-04 | 0.7007        | 0.7255        | 0.7219   | 0.7191        | 0.6924        |
| SGD / Cosine  | 1.00E-01 | <b>0.9153</b> | 0.9121        | 0.9139   | 0.9121        | 0.9082        |
|               | 1.00E-02 | 0.9026        | 0.9059        | 0.9088   | 0.8939        | 0.8972        |
|               | 1.00E-03 | 0.8547        | 0.8514        | 0.8479   | 0.8659        | 0.8597        |
|               | 1.00E-04 | 0.6906        | 0.6525        | 0.6776   | 0.6604        | 0.6931        |
| Adam / Cosine | 1.00E-02 | 0.6615        | 0.5603        | 0.6999   | 0.7993        | 0.6967        |
|               | 1.00E-03 | 0.9227        | <b>0.9236</b> | 0.9126   | 0.9203        | 0.9203        |
|               | 1.00E-04 | 0.9122        | 0.9127        | 0.9064   | 0.9101        | 0.9145        |
|               | 1.00E-05 | 0.8946        | 0.8938        | 0.8893   | 0.8928        | 0.8955        |
|               |          |               |               |          |               |               |

|                   |          |          |               |               |               |               |
|-------------------|----------|----------|---------------|---------------|---------------|---------------|
|                   |          |          |               |               |               |               |
| Resnet152         |          |          |               |               |               |               |
|                   | lr \ wd  | 1.00E-03 | 1.00E-04      | 1.00E-05      | 1.00E-06      | 0             |
| SGD / Step        | 1.00E-01 | 0.6648   | 0.6581        | 0.6999        | 0.7025        | 0.7002        |
|                   | 1.00E-02 | 0.9159   | 0.9086        | 0.9188        | <b>0.9228</b> | 0.9194        |
|                   | 1.00E-03 | 0.9129   | 0.9093        | 0.9051        | 0.9004        | 0.9042        |
|                   | 1.00E-04 | 0.7626   | 0.7768        | 0.7695        | 0.7668        | 0.7546        |
| SGD / Cosine      | 1.00E-01 | 0.6905   | 0.7570        | 0.5382        | 0.6424        | 0.6889        |
|                   | 1.00E-02 | 0.9124   | <b>0.9168</b> | 0.9158        | 0.9163        | <b>0.9168</b> |
|                   | 1.00E-03 | 0.8810   | 0.8955        | 0.8918        | 0.8984        | 0.8932        |
|                   | 1.00E-04 | 0.7206   | 0.7364        | 0.7406        | 0.7513        | 0.7468        |
| Adam / Cosine     | 1.00E-02 | 0.7154   | 0.6978        | 0.6857        | 0.7100        | 0.7055        |
|                   | 1.00E-03 | 0.9173   | 0.9094        | 0.9150        | 0.9130        | 0.9084        |
|                   | 1.00E-04 | 0.9207   | <b>0.9216</b> | 0.9157        | 0.9175        | 0.9159        |
|                   | 1.00E-05 | 0.9086   | 0.8998        | 0.9001        | 0.9038        | 0.9114        |
|                   |          |          |               |               |               |               |
|                   |          |          |               |               |               |               |
|                   |          |          |               |               |               |               |
| MobileNetV3 Small |          |          |               |               |               |               |
|                   | lr \ wd  | 1.00E-03 | 1.00E-04      | 1.00E-05      | 1.00E-06      | 0             |
| SGD / Step        | 1.00E-01 | 0.7116   | 0.9129        | 0.9079        | 0.9205        | <b>0.9230</b> |
|                   | 1.00E-02 | 0.9175   | 0.9160        | 0.9122        | 0.9162        | 0.9136        |
|                   | 1.00E-03 | 0.8596   | 0.8701        | 0.8623        | 0.8661        | 0.8742        |
|                   | 1.00E-04 | 0.7115   | 0.6758        | 0.6748        | 0.6981        | 0.6990        |
| SGD / Cosine      | 1.00E-01 | 0.8880   | 0.9089        | 0.9050        | <b>0.9221</b> | 0.9065        |
|                   | 1.00E-02 | 0.9155   | 0.9165        | 0.9218        | 0.9076        | 0.9096        |
|                   | 1.00E-03 | 0.8405   | 0.8389        | 0.8370        | 0.8329        | 0.8353        |
|                   | 1.00E-04 | 0.6596   | 0.6840        | 0.6525        | 0.6646        | 0.6365        |
| Adam / Cosine     | 1.00E-02 | 0.7789   | 0.9075        | 0.9012        | 0.8904        | 0.8928        |
|                   | 1.00E-03 | 0.8727   | 0.9133        | <b>0.9183</b> | 0.9075        | 0.9097        |
|                   | 1.00E-04 | 0.8511   | 0.8993        | 0.9027        | 0.9002        | 0.8930        |
|                   | 1.00E-05 | 0.6245   | 0.7601        | 0.7694        | 0.7600        | 0.7441        |

|               |          |               |               |               |               |               |
|---------------|----------|---------------|---------------|---------------|---------------|---------------|
|               |          |               |               |               |               |               |
|               |          |               |               |               |               |               |
| DeiT Tiny     |          |               |               |               |               |               |
|               | lr \ wd  | 1.00E-03      | 1.00E-04      | 1.00E-05      | 1.00E-06      | 0             |
| SGD / Step    | 1.00E-01 | 0.4012        | 0.0000        | 0.0000        | 0.1017        | 0.3684        |
|               | 1.00E-02 | 0.8818        | 0.7272        | 0.6982        | 0.7567        | 0.8190        |
|               | 1.00E-03 | 0.8915        | <b>0.9037</b> | 0.8952        | 0.8920        | 0.8943        |
|               | 1.00E-04 | 0.8049        | 0.7947        | 0.7878        | 0.8020        | 0.8112        |
| SGD / Cosine  | 1.00E-01 | 0.3226        | 0.3598        | 0.0674        | 0.0053        | 0.3759        |
|               | 1.00E-02 | 0.7855        | 0.8746        | 0.8801        | 0.8059        | 0.6853        |
|               | 1.00E-03 | 0.8957        | 0.8939        | 0.8849        | 0.8948        | <b>0.9032</b> |
|               | 1.00E-04 | 0.7837        | 0.7976        | 0.8112        | 0.7993        | 0.8090        |
| Adam / Cosine | 1.00E-02 | 0.6907        | 0.6163        | 0.5194        | 0.6148        | 0.4509        |
|               | 1.00E-03 | 0.7203        | 0.6962        | 0.7201        | 0.6961        | 0.7048        |
|               | 1.00E-04 | 0.9038        | 0.9038        | 0.8996        | <b>0.9130</b> | 0.9109        |
|               | 1.00E-05 | 0.7882        | 0.8429        | 0.8439        | 0.8271        | 0.8635        |
|               |          |               |               |               |               |               |
|               |          |               |               |               |               |               |
| DeiT Small    |          |               |               |               |               |               |
|               | lr \ wd  | 1.00E-03      | 1.00E-04      | 1.00E-05      | 1.00E-06      | 0             |
| SGD / Step    | 1.00E-01 | 0.0000        | 0.0000        | 0.0835        | 0.3879        | 0.0000        |
|               | 1.00E-02 | 0.8714        | 0.8797        | 0.8926        | 0.8790        | 0.8949        |
|               | 1.00E-03 | <b>0.9032</b> | 0.9017        | 0.8998        | 0.8938        | 0.8995        |
|               | 1.00E-04 | 0.7765        | 0.7724        | 0.7753        | 0.7812        | 0.7781        |
| SGD / Cosine  | 1.00E-01 | 0.0000        | 0.0000        | 0.0000        | 0.0000        | 0.0000        |
|               | 1.00E-02 | 0.7242        | 0.8027        | <b>0.9057</b> | 0.7573        | 0.7013        |
|               | 1.00E-03 | 0.8950        | 0.8888        | 0.8974        | 0.8969        | 0.9040        |
|               | 1.00E-04 | 0.7883        | 0.7648        | 0.7671        | 0.7745        | 0.7796        |
| Adam / Cosine | 1.00E-02 | 0.6299        | 0.4583        | 0.3939        | 0.3875        | 0.3517        |
|               | 1.00E-03 | 0.7182        | 0.7176        | 0.7183        | 0.6900        | 0.7019        |
|               | 1.00E-04 | 0.9058        | <b>0.9205</b> | 0.9197        | 0.9162        | 0.9179        |

|                     |          |          |          |               |               |               |
|---------------------|----------|----------|----------|---------------|---------------|---------------|
|                     | 1.00E-05 | 0.7975   | 0.8890   | 0.8754        | 0.8569        | 0.8815        |
|                     |          |          |          |               |               |               |
|                     |          |          |          |               |               |               |
| Inception-ResNet v2 |          |          |          |               |               |               |
|                     | lr \ wd  | 1.00E-03 | 1.00E-04 | 1.00E-05      | 1.00E-06      | 0             |
| SGD / Step          | 1.00E-01 | 0.8027   | 0.9034   | 0.7651        | 0.9074        | <b>0.9075</b> |
|                     | 1.00E-02 | 0.8913   | 0.8828   | 0.8822        | 0.8870        | 0.9014        |
|                     | 1.00E-03 | 0.7970   | 0.7954   | 0.7940        | 0.7915        | 0.7995        |
|                     | 1.00E-04 | 0.3819   | 0.4402   | 0.4549        | 0.4420        | 0.5300        |
| SGD / Cosine        | 1.00E-01 | 0.7726   | 0.8996   | 0.8755        | 0.9004        | <b>0.9147</b> |
|                     | 1.00E-02 | 0.8942   | 0.9000   | 0.9033        | 0.8825        | 0.9100        |
|                     | 1.00E-03 | 0.7947   | 0.7922   | 0.7961        | 0.8051        | 0.7940        |
|                     | 1.00E-04 | 0.4446   | 0.5366   | 0.4380        | 0.4813        | 0.4751        |
| Adam / Cosine       | 1.00E-02 | 0.8011   | 0.7991   | 0.7992        | 0.7695        | 0.8046        |
|                     | 1.00E-03 | 0.9104   | 0.9081   | 0.9072        | <b>0.9168</b> | 0.9097        |
|                     | 1.00E-04 | 0.8928   | 0.9105   | 0.9056        | 0.8972        | 0.9066        |
|                     | 1.00E-05 | 0.8658   | 0.8652   | 0.8517        | 0.8731        | 0.8618        |
|                     |          |          |          |               |               |               |
|                     |          |          |          |               |               |               |
| VGG-16 BN           |          |          |          |               |               |               |
|                     | lr \ wd  | 1.00E-03 | 1.00E-04 | 1.00E-05      | 1.00E-06      | 0             |
| SGD / Step          | 1.00E-01 | 0.6897   | 0.5958   | 0.4807        | 0.4227        | 0.6589        |
|                     | 1.00E-02 | 0.9181   | 0.9214   | 0.9226        | <b>0.9250</b> | 0.9198        |
|                     | 1.00E-03 | 0.9114   | 0.9145   | 0.9085        | 0.9167        | 0.9172        |
|                     | 1.00E-04 | 0.8003   | 0.7963   | 0.7868        | 0.7905        | 0.7902        |
| SGD / Cosine        | 1.00E-01 | 0.7040   | 0.7091   | 0.0000        | 0.6883        | 0.6900        |
|                     | 1.00E-02 | 0.9207   | 0.9151   | <b>0.9220</b> | 0.9204        | 0.9165        |
|                     | 1.00E-03 | 0.9119   | 0.9100   | 0.9127        | 0.9099        | 0.9133        |
|                     | 1.00E-04 | 0.7882   | 0.7943   | 0.7885        | 0.7842        | 0.7885        |
| Adam / Cosine       | 1.00E-02 | 0.6515   | 0.5707   | 0.5358        | 0.5778        | 0.5797        |
|                     | 1.00E-03 | 0.8951   | 0.9075   | 0.8991        | 0.8922        | 0.8957        |

|                 |          |               |               |               |          |               |
|-----------------|----------|---------------|---------------|---------------|----------|---------------|
|                 | 1.00E-04 | <b>0.9287</b> | 0.9192        | 0.9191        | 0.9200   | 0.9165        |
|                 | 1.00E-05 | 0.9189        | 0.9173        | 0.9179        | 0.9186   | 0.9069        |
|                 |          |               |               |               |          |               |
|                 |          |               |               |               |          |               |
| EfficientNet B0 |          |               |               |               |          |               |
|                 | lr \ wd  | 1.00E-03      | 1.00E-04      | 1.00E-05      | 1.00E-06 | 0             |
| SGD / Step      | 1.00E-01 | 0.7230        | 0.6986        | 0.6966        | 0.6615   | 0.6602        |
|                 | 1.00E-02 | 0.8989        | 0.8979        | 0.9036        | 0.8994   | <b>0.9159</b> |
|                 | 1.00E-03 | 0.8805        | 0.8689        | 0.8787        | 0.8669   | 0.8656        |
|                 | 1.00E-04 | 0.7652        | 0.7872        | 0.7940        | 0.7740   | 0.7675        |
| SGD / Cosine    | 1.00E-01 | 0.7752        | 0.7086        | 0.7350        | 0.7050   | 0.8683        |
|                 | 1.00E-02 | 0.9002        | 0.8959        | 0.9062        | 0.9069   | <b>0.9089</b> |
|                 | 1.00E-03 | 0.8774        | 0.8785        | 0.8773        | 0.8861   | 0.8724        |
|                 | 1.00E-04 | 0.7360        | 0.7867        | 0.7490        | 0.7311   | 0.7941        |
| Adam / Cosine   | 1.00E-02 | 0.9126        | 0.8891        | 0.8709        | 0.9005   | 0.8746        |
|                 | 1.00E-03 | 0.9068        | <b>0.9195</b> | 0.9176        | 0.9177   | 0.9073        |
|                 | 1.00E-04 | 0.9118        | 0.8917        | 0.8931        | 0.8902   | 0.8947        |
|                 | 1.00E-05 | 0.8141        | 0.7924        | 0.8077        | 0.8115   | 0.7892        |
|                 |          |               |               |               |          |               |
|                 |          |               |               |               |          |               |
| EfficientNet B4 |          |               |               |               |          |               |
|                 | lr \ wd  | 1.00E-03      | 1.00E-04      | 1.00E-05      | 1.00E-06 | 0             |
| SGD / Step      | 1.00E-01 | 0.9119        | 0.9035        | <b>0.9144</b> | 0.9041   | 0.9067        |
|                 | 1.00E-02 | 0.8543        | 0.8669        | 0.8312        | 0.8258   | 0.8640        |
|                 | 1.00E-03 | 0.6751        | 0.6360        | 0.7097        | 0.6645   | 0.6922        |
|                 | 1.00E-04 | 0.2970        | 0.2856        | 0.3161        | 0.2242   | 0.3828        |
| SGD / Cosine    | 1.00E-01 | 0.9014        | 0.8967        | 0.9046        | 0.9040   | <b>0.9118</b> |
|                 | 1.00E-02 | 0.8570        | 0.8354        | 0.8504        | 0.8452   | 0.8304        |
|                 | 1.00E-03 | 0.6664        | 0.7188        | 0.7119        | 0.6619   | 0.6727        |
|                 | 1.00E-04 | 0.1755        | 0.2135        | 0.2444        | 0.3385   | 0.3815        |
| Adam / Cosine   | 1.00E-02 | <b>0.9211</b> | 0.9198        | 0.9128        | 0.9205   | 0.9017        |

|                  |          |          |               |          |               |               |
|------------------|----------|----------|---------------|----------|---------------|---------------|
|                  | 1.00E-03 | 0.9039   | 0.9068        | 0.9049   | 0.9099        | 0.9102        |
|                  | 1.00E-04 | 0.8804   | 0.8907        | 0.8862   | 0.8707        | 0.8720        |
|                  | 1.00E-05 | 0.7605   | 0.7311        | 0.6896   | 0.6918        | 0.6980        |
|                  |          |          |               |          |               |               |
|                  |          |          |               |          |               |               |
| DenseNet-121     |          |          |               |          |               |               |
|                  | lr \ wd  | 1.00E-03 | 1.00E-04      | 1.00E-05 | 1.00E-06      | 0             |
| SGD / Step       | 1.00E-01 | 0.6884   | 0.6260        | 0.6421   | 0.6702        | 0.6830        |
|                  | 1.00E-02 | 0.9135   | 0.9179        | 0.9175   | 0.9146        | <b>0.9200</b> |
|                  | 1.00E-03 | 0.9083   | 0.9150        | 0.9084   | 0.9074        | 0.8983        |
|                  | 1.00E-04 | 0.7800   | 0.7595        | 0.7637   | 0.7730        | 0.7610        |
| SGD / Cosine     | 1.00E-01 | 0.6685   | 0.7057        | 0.6920   | 0.6630        | 0.6984        |
|                  | 1.00E-02 | 0.9162   | 0.9126        | 0.9116   | 0.9185        | <b>0.9215</b> |
|                  | 1.00E-03 | 0.9116   | 0.9094        | 0.9071   | 0.9117        | 0.9072        |
|                  | 1.00E-04 | 0.7753   | 0.7665        | 0.7575   | 0.7610        | 0.7643        |
| Adam / Cosine    | 1.00E-02 | 0.7255   | 0.7271        | 0.7528   | 0.7045        | 0.7044        |
|                  | 1.00E-03 | 0.9138   | <b>0.9287</b> | 0.9186   | 0.9190        | 0.9160        |
|                  | 1.00E-04 | 0.9146   | 0.9162        | 0.9154   | 0.9175        | 0.9183        |
|                  | 1.00E-05 | 0.8924   | 0.8771        | 0.8895   | 0.8754        | 0.8804        |
|                  |          |          |               |          |               |               |
|                  |          |          |               |          |               |               |
| ResNeXt-50-32x4d |          |          |               |          |               |               |
|                  | lr \ wd  | 1.00E-03 | 1.00E-04      | 1.00E-05 | 1.00E-06      | 0             |
| SGD / Step       | 1.00E-01 | 0.6657   | 0.6340        | 0.6457   | 0.6335        | 0.6701        |
|                  | 1.00E-02 | 0.9206   | 0.9104        | 0.9163   | <b>0.9212</b> | 0.9084        |
|                  | 1.00E-03 | 0.9145   | 0.9049        | 0.9039   | 0.9093        | 0.9066        |
|                  | 1.00E-04 | 0.7810   | 0.7852        | 0.7859   | 0.7860        | 0.7858        |
| SGD / Cosine     | 1.00E-01 | 0.7212   | 0.7058        | 0.6875   | 0.6875        | 0.6591        |
|                  | 1.00E-02 | 0.9089   | 0.9180        | 0.9184   | 0.9202        | <b>0.9210</b> |
|                  | 1.00E-03 | 0.9079   | 0.9123        | 0.9027   | 0.9080        | 0.9076        |
|                  | 1.00E-04 | 0.7838   | 0.7837        | 0.7904   | 0.7889        | 0.7725        |

|                    |          |               |               |               |               |        |
|--------------------|----------|---------------|---------------|---------------|---------------|--------|
| Adam / Cosine      | 1.00E-02 | 0.7451        | 0.7152        | 0.7156        | 0.7003        | 0.7051 |
|                    | 1.00E-03 | 0.9199        | 0.9122        | 0.9101        | 0.9127        | 0.9128 |
|                    | 1.00E-04 | 0.9189        | 0.9189        | <b>0.9210</b> | 0.9167        | 0.9205 |
|                    | 1.00E-05 | 0.9064        | 0.9174        | 0.9008        | 0.9110        | 0.9048 |
|                    |          |               |               |               |               |        |
|                    |          |               |               |               |               |        |
| ShuffleNet v2 x1.0 |          |               |               |               |               |        |
|                    | lr \ wd  | 1.00E-03      | 1.00E-04      | 1.00E-05      | 1.00E-06      | 0      |
| SGD / Step         | 1.00E-01 | <b>0.9152</b> | 0.9082        | 0.8960        | 0.9075        | 0.9135 |
|                    | 1.00E-02 | 0.8056        | 0.7976        | 0.8017        | 0.8034        | 0.7995 |
|                    | 1.00E-03 | 0.0130        | 0.1003        | 0.0000        | 0.1046        | 0.0043 |
|                    | 1.00E-04 | 0.1990        | 0.0131        | 0.2548        | 0.0035        | 0.0000 |
| SGD / Cosine       | 1.00E-01 | 0.9044        | 0.9119        | <b>0.9202</b> | 0.9114        | 0.9105 |
|                    | 1.00E-02 | 0.8055        | 0.7913        | 0.7935        | 0.7996        | 0.8095 |
|                    | 1.00E-03 | 0.0710        | 0.0000        | 0.0000        | 0.0000        | 0.0884 |
|                    | 1.00E-04 | 0.0000        | 0.0191        | 0.0441        | 0.0076        | 0.4458 |
| Adam / Cosine      | 1.00E-02 | 0.9112        | 0.9058        | 0.9154        | <b>0.9171</b> | 0.9163 |
|                    | 1.00E-03 | 0.9057        | 0.9114        | 0.9062        | 0.9078        | 0.9108 |
|                    | 1.00E-04 | 0.8114        | 0.8261        | 0.8535        | 0.8429        | 0.8501 |
|                    | 1.00E-05 | 0.6521        | 0.6846        | 0.7319        | 0.6972        | 0.7348 |
|                    |          |               |               |               |               |        |
|                    |          |               |               |               |               |        |
| ConvNext tiny      |          |               |               |               |               |        |
|                    | lr \ wd  | 1.00E-03      | 1.00E-04      | 1.00E-05      | 1.00E-06      | 0      |
| SGD / Step         | 1.00E-01 | 0.5668        | 0.5463        | 0.0000        | 0.0000        | 0.0000 |
|                    | 1.00E-02 | 0.9160        | <b>0.9218</b> | 0.9204        | 0.9159        | 0.9012 |
|                    | 1.00E-03 | 0.8266        | 0.8500        | 0.8277        | 0.8621        | 0.8466 |
|                    | 1.00E-04 | 0.7551        | 0.7009        | 0.7263        | 0.7028        | 0.7316 |
| SGD / Cosine       | 1.00E-01 | 0.0000        | 0.5941        | 0.0000        | 0.0000        | 0.0000 |
|                    | 1.00E-02 | 0.9125        | <b>0.9175</b> | 0.9095        | 0.9149        | 0.9131 |
|                    | 1.00E-03 | 0.8679        | 0.8791        | 0.8763        | 0.8240        | 0.8541 |



|                    |          |          |               |          |               |               |
|--------------------|----------|----------|---------------|----------|---------------|---------------|
|                    | 1.00E-04 | 0.7000   | 0.7084        | 0.7360   | 0.7486        | 0.7415        |
| Adam / Cosine      | 1.00E-02 | 0.0000   | 0.0000        | 0.0000   | 0.0000        | 0.0000        |
|                    | 1.00E-03 | 0.9139   | 0.9140        | 0.9294   | 0.9239        | <b>0.9297</b> |
|                    | 1.00E-04 | 0.9174   | 0.9206        | 0.9038   | 0.9078        | 0.9229        |
|                    | 1.00E-05 | 0.7894   | 0.8794        | 0.8217   | 0.8556        | 0.8774        |
|                    |          |          |               |          |               |               |
|                    |          |          |               |          |               |               |
| ShuffleNet_V2_X0_5 |          |          |               |          |               |               |
|                    | lr \ wd  | 1.00E-03 | 1.00E-04      | 1.00E-05 | 1.00E-06      | 0             |
| SGD / Step         | 1.00E-01 | 0.9075   | 0.9226        | 0.9107   | 0.9045        | <b>0.9227</b> |
|                    | 1.00E-02 | 0.7816   | 0.7818        | 0.7891   | 0.7877        | 0.7855        |
|                    | 1.00E-03 | 0.0028   | 0.0000        | 0.0000   | 0.0000        | 0.0102        |
|                    | 1.00E-04 | 0.2165   | 0.1559        | 0.1806   | 0.0008        | 0.0880        |
| SGD / Cosine       | 1.00E-01 | 0.9129   | 0.9145        | 0.9128   | 0.9161        | <b>0.9201</b> |
|                    | 1.00E-02 | 0.7974   | 0.7783        | 0.7815   | 0.7873        | 0.7836        |
|                    | 1.00E-03 | 0.0292   | 0.0000        | 0.0519   | 0.0074        | 0.0058        |
|                    | 1.00E-04 | 0.0129   | 0.0052        | 0.0465   | 0.0079        | 0.0000        |
| Adam / Cosine      | 1.00E-02 | 0.9080   | 0.9098        | 0.9158   | <b>0.9214</b> | 0.9092        |
|                    | 1.00E-03 | 0.9060   | 0.9044        | 0.8979   | 0.8982        | 0.9072        |
|                    | 1.00E-04 | 0.7954   | 0.7560        | 0.7582   | 0.7639        | 0.7625        |
|                    | 1.00E-05 | 0.0186   | 0.3528        | 0.4198   | 0.5887        | 0.6508        |
|                    |          |          |               |          |               |               |
|                    |          |          |               |          |               |               |
| SqueezeNet1_1      |          |          |               |          |               |               |
|                    | lr \ wd  | 1.00E-03 | 1.00E-04      | 1.00E-05 | 1.00E-06      | 0             |
| SGD / Step         | 1.00E-01 | 0.0000   | 0.0000        | 0.0000   | 0.0000        | 0.0000        |
|                    | 1.00E-02 | 0.5719   | 0.0000        | 0.6901   | 0.0000        | 0.0000        |
|                    | 1.00E-03 | 0.8657   | <b>0.8794</b> | 0.8692   | 0.8674        | 0.8787        |
|                    | 1.00E-04 | 0.8247   | 0.8508        | 0.8471   | 0.8206        | 0.8407        |
| SGD / Cosine       | 1.00E-01 | 0.0000   | 0.0000        | 0.0000   | 0.0000        | 0.0000        |
|                    | 1.00E-02 | 0.6707   | 0.6749        | 0.6309   | 0.6129        | 0.0000        |

|               |          |        |        |               |               |        |
|---------------|----------|--------|--------|---------------|---------------|--------|
|               | 1.00E-03 | 0.8880 | 0.8790 | <b>0.9001</b> | 0.8808        | 0.8972 |
|               | 1.00E-04 | 0.8342 | 0.8285 | 0.8549        | 0.8475        | 0.8283 |
| Adam / Cosine | 1.00E-02 | 0.0000 | 0.5715 | 0.0000        | 0.0000        | 0.6122 |
|               | 1.00E-03 | 0.8174 | 0.8194 | 0.7941        | 0.8059        | 0.8047 |
|               | 1.00E-04 | 0.8703 | 0.8847 | 0.8991        | <b>0.9021</b> | 0.8910 |
|               | 1.00E-05 | 0.5497 | 0.8050 | 0.8270        | 0.7850        | 0.8022 |
