# Supplementary material
Source: ML conference proceedings conference paper supplement (https://openreview.net/forum?id=7T2XgpklLDA)
Supplement: supplementary_material [file attachment]

|               |          |                 |                        |                        |                        |                        |
|---------------|----------|-----------------|------------------------|------------------------|------------------------|------------------------|
| ResNet 50     |          |                 |                        |                        |                        |                        |
|               | lr \ wd  | 1.00E-03        | 1.00E-04               | 1.00E-05               | 1.00E-06               | 0                      |
| SGD / Step    | 1.00E-01 | 0.4107 / 0.4096 | 0.5778 / 0.6015        | 0.6034 / 0.5650        | <b>0.6146 / 0.5566</b> | 0.6129 / 0.5939        |
|               | 1.00E-02 | 0.3096 / 0.3184 | 0.3049 / 0.3034        | 0.3032 / 0.3066        | 0.3041 / 0.3006        | 0.3024 / 0.3057        |
|               | 1.00E-03 | 0.0826 / 0.0884 | 0.0950 / 0.0943        | 0.0892 / 0.0889        | 0.0945 / 0.0961        | 0.0920 / 0.0946        |
|               | 1.00E-04 | 0.0311 / 0.0319 | 0.0324 / 0.0329        | 0.0321 / 0.0321        | 0.0309 / 0.0314        | 0.0332 / 0.0344        |
| SGD / Cosine  | 1.00E-01 | 0.4356 / 0.4303 | 0.6189 / 0.5747        | 0.6207 / 0.6040        | 0.5963 / 0.5690        | <b>0.6233 / 0.5931</b> |
|               | 1.00E-02 | 0.3119 / 0.3067 | 0.3061 / 0.3023        | 0.3020 / 0.3075        | 0.2957 / 0.3045        | 0.3033 / 0.3019        |
|               | 1.00E-03 | 0.0877 / 0.0890 | 0.0887 / 0.0852        | 0.0879 / 0.0923        | 0.0838 / 0.0842        | 0.0878 / 0.0852        |
|               | 1.00E-04 | 0.0311 / 0.0322 | 0.0318 / 0.0320        | 0.0294 / 0.0292        | 0.0341 / 0.0351        | 0.0310 / 0.0312        |
| Adam / Cosine | 1.00E-02 | 0.4899 / 0.4877 | 0.4725 / 0.4479        | 0.4819 / 0.4576        | 0.4356 / 0.4243        | 0.4263 / 0.4461        |
|               | 1.00E-03 | 0.6092 / 0.6088 | 0.6683 / 0.6439        | <b>0.6718 / 0.6502</b> | 0.6656 / 0.6397        | 0.6540 / 0.6544        |
|               | 1.00E-04 | 0.5209 / 0.5203 | 0.6585 / 0.6109        | 0.6627 / 0.6404        | 0.6615 / 0.6468        | 0.6370 / 0.6507        |
|               | 1.00E-05 | 0.0256 / 0.0253 | 0.4405 / 0.4282        | 0.4298 / 0.4240        | 0.4379 / 0.4266        | 0.4528 / 0.4282        |
|               |          |                 |                        |                        |                        |                        |
|               |          |                 |                        |                        |                        |                        |
| AlexNet       |          |                 |                        |                        |                        |                        |
|               | lr \ wd  | 1.00E-03        | 1.00E-04               | 1.00E-05               | 1.00E-06               | 0                      |
| SGD / Step    | 1.00E-01 | 0.1069 / 0.1078 | <b>0.2957 / 0.2805</b> | 0.2956 / 0.3058        | 0.2918 / 0.2955        | 0.2916 / 0.2882        |
|               | 1.00E-02 | 0.1988 / 0.1938 | 0.2064 / 0.1967        | 0.1927 / 0.1924        | 0.1978 / 0.1864        | 0.1892 / 0.1830        |
|               | 1.00E-03 | 0.0970 / 0.0980 | 0.0877 / 0.0905        | 0.1041 / 0.0971        | 0.0902 / 0.0903        | 0.1002 / 0.0984        |
|               | 1.00E-04 | 0.0466 / 0.0458 | 0.0461 / 0.0480        | 0.0474 / 0.0484        | 0.0418 / 0.0429        | 0.0449 / 0.0453        |
| SGD / Cosine  | 1.00E-01 | 0.1049 / 0.1060 | 0.2841 / 0.2811        | 0.2873 / 0.2870        | <b>0.2928 / 0.2960</b> | 0.2798 / 0.2756        |
|               | 1.00E-02 | 0.1951 / 0.1903 | 0.1963 / 0.1908        | 0.1941 / 0.1901        | 0.1939 / 0.1943        | 0.2029 / 0.1981        |
|               | 1.00E-03 | 0.0914 / 0.0852 | 0.0960 / 0.0922        | 0.0947 / 0.0983        | 0.0955 / 0.0990        | 0.0987 / 0.0950        |
|               | 1.00E-04 | 0.0477 / 0.0465 | 0.0455 / 0.0474        | 0.0439 / 0.0453        | 0.0489 / 0.0528        | 0.0482 / 0.0486        |
| Adam / Cosine | 1.00E-02 | 0.0209 / 0.0209 | 0.0209 / 0.0209        | 0.0209 / 0.0209        | 0.0209 / 0.0209        | 0.0209 / 0.0209        |
|               | 1.00E-03 | 0.2912 / 0.2916 | 0.2926 / 0.2869        | 0.0209 / 0.0209        | 0.0209 / 0.0209        | 0.2966 / 0.2995        |
|               | 1.00E-04 | 0.2582 / 0.2638 | 0.3842 / 0.3400        | <b>0.3846 / 0.3699</b> | 0.3743 / 0.3799        | 0.3472 / 0.3531        |
|               | 1.00E-05 | 0.0448 / 0.0471 | 0.2265 / 0.2167        | 0.2173 / 0.2119        | 0.2243 / 0.2276        | 0.2220 / 0.2166        |
|               |          |                 |                        |                        |                        |                        |
|               |          |                 |                        |                        |                        |                        |

|               |          |                 |                        |                        |                 |                 |
|---------------|----------|-----------------|------------------------|------------------------|-----------------|-----------------|
| VGG13BN       |          |                 |                        |                        |                 |                 |
|               | lr \ wd  | 1.00E-03        | 1.00E-04               | 1.00E-05               | 1.00E-06        | 0               |
| SGD / Step    | 1.00E-01 | 0.4395 / 0.4282 | 0.5941 / 0.5228        | <b>0.5961 / 0.5271</b> | 0.5901 / 0.5564 | 0.5919 / 0.5630 |
|               | 1.00E-02 | 0.3251 / 0.3163 | 0.3305 / 0.3190        | 0.3251 / 0.3212        | 0.3264 / 0.3175 | 0.3247 / 0.3179 |
|               | 1.00E-03 | 0.1281 / 0.1245 | 0.1286 / 0.1296        | 0.1283 / 0.1262        | 0.1249 / 0.1177 | 0.1245 / 0.1265 |
|               | 1.00E-04 | 0.0390 / 0.0371 | 0.0392 / 0.0395        | 0.0398 / 0.0426        | 0.0380 / 0.0385 | 0.0362 / 0.0377 |
| SGD / Cosine  | 1.00E-01 | 0.4539 / 0.4418 | <b>0.6016 / 0.5489</b> | 0.6012 / 0.5439        | 0.5910 / 0.5394 | 0.6009 / 0.5454 |
|               | 1.00E-02 | 0.3198 / 0.3178 | 0.3317 / 0.3290        | 0.3298 / 0.3169        | 0.3211 / 0.3092 | 0.3204 / 0.3181 |
|               | 1.00E-03 | 0.1270 / 0.1232 | 0.1336 / 0.1229        | 0.1298 / 0.1258        | 0.1304 / 0.1241 | 0.1241 / 0.1216 |
|               | 1.00E-04 | 0.0336 / 0.0375 | 0.0372 / 0.0366        | 0.0357 / 0.0354        | 0.0368 / 0.0356 | 0.0378 / 0.0398 |
| Adam / Cosine | 1.00E-02 | 0.2723 / 0.2578 | 0.0391 / 0.0401        | 0.1128 / 0.1091        | 0.0384 / 0.0391 | 0.0689 / 0.0691 |
|               | 1.00E-03 | 0.6368 / 0.5927 | 0.6396 / 0.6058        | 0.5851 / 0.5734        | 0.6010 / 0.5566 | 0.6018 / 0.5618 |
|               | 1.00E-04 | 0.6356 / 0.6414 | 0.6749 / 0.6590        | <b>0.6794 / 0.6493</b> | 0.6681 / 0.6298 | 0.6559 / 0.6399 |
|               | 1.00E-05 | 0.2732 / 0.2646 | 0.3785 / 0.3724        | 0.3722 / 0.3683        | 0.3665 / 0.3903 | 0.3703 / 0.3932 |
|               |          |                 |                        |                        |                 |                 |
|               |          |                 |                        |                        |                 |                 |
| PNASNet5      |          |                 |                        |                        |                 |                 |
|               | lr \ wd  | 1.00E-03        | 1.00E-04               | 1.00E-05               | 1.00E-06        | 0               |
| SGD / Step    | 1.00E-01 | 0.3496 / 0.3317 | <b>0.5325 / 0.5073</b> | 0.5153 / 0.5009        | 0.5057 / 0.4673 | 0.5220 / 0.4721 |
|               | 1.00E-02 | 0.2551 / 0.2522 | 0.2271 / 0.2154        | 0.2244 / 0.2123        | 0.2253 / 0.2197 | 0.2344 / 0.2282 |
|               | 1.00E-03 | 0.0761 / 0.0733 | 0.0834 / 0.0784        | 0.0785 / 0.0836        | 0.0763 / 0.0800 | 0.0776 / 0.0785 |
|               | 1.00E-04 | 0.0316 / 0.0294 | 0.0301 / 0.0316        | 0.0299 / 0.0289        | 0.0309 / 0.0313 | 0.0293 / 0.0297 |
| SGD / Cosine  | 1.00E-01 | 0.3651 / 0.3532 | <b>0.5437 / 0.5211</b> | 0.5154 / 0.4866        | 0.5054 / 0.4900 | 0.4977 / 0.4687 |
|               | 1.00E-02 | 0.2573 / 0.2471 | 0.2252 / 0.2233        | 0.2266 / 0.2149        | 0.2214 / 0.2152 | 0.2265 / 0.2122 |
|               | 1.00E-03 | 0.0747 / 0.0770 | 0.0713 / 0.0764        | 0.0715 / 0.0747        | 0.0735 / 0.0728 | 0.0708 / 0.0722 |
|               | 1.00E-04 | 0.0312 / 0.0322 | 0.0334 / 0.0334        | 0.0314 / 0.0316        | 0.0312 / 0.0342 | 0.0307 / 0.0334 |
| Adam / Cosine | 1.00E-02 | 0.5437 / 0.5627 | 0.5376 / 0.5302        | 0.5188 / 0.4895        | 0.4593 / 0.4503 | 0.4277 / 0.4279 |
|               | 1.00E-03 | 0.6881 / 0.6785 | 0.6816 / 0.6521        | <b>0.6941 / 0.6873</b> | 0.6886 / 0.6717 | 0.6763 / 0.6599 |
|               | 1.00E-04 | 0.4398 / 0.4397 | 0.6409 / 0.6448        | 0.6435 / 0.6144        | 0.6165 / 0.6162 | 0.6335 / 0.6242 |
|               | 1.00E-05 | 0.0209 / 0.0209 | 0.4505 / 0.4407        | 0.4317 / 0.4143        | 0.4375 / 0.4100 | 0.4374 / 0.4331 |
|               |          |                 |                        |                        |                 |                 |

|                   |          |                 |                 |                        |                        |                        |
|-------------------|----------|-----------------|-----------------|------------------------|------------------------|------------------------|
| Resnet152         |          |                 |                 |                        |                        |                        |
|                   | lr \ wd  | 1.00E-03        | 1.00E-04        | 1.00E-05               | 1.00E-06               | 0                      |
| SGD / Step        | 1.00E-01 | 0.4077 / 0.3993 | 0.5765 / 0.5696 | <b>0.5879 / 0.5584</b> | 0.5856 / 0.5421        | 0.5733 / 0.5396        |
|                   | 1.00E-02 | 0.3158 / 0.3143 | 0.3121 / 0.3063 | 0.3117 / 0.3112        | 0.3123 / 0.3124        | 0.2957 / 0.2963        |
|                   | 1.00E-03 | 0.0965 / 0.0996 | 0.1011 / 0.1011 | 0.0969 / 0.0959        | 0.1035 / 0.1027        | 0.1010 / 0.0969        |
|                   | 1.00E-04 | 0.0335 / 0.0342 | 0.0332 / 0.0345 | 0.0296 / 0.0297        | 0.0322 / 0.0331        | 0.0351 / 0.0346        |
| SGD / Cosine      | 1.00E-01 | 0.4248 / 0.4284 | 0.5719 / 0.5876 | 0.5710 / 0.5480        | 0.5860 / 0.5508        | <b>0.6018 / 0.5570</b> |
|                   | 1.00E-02 | 0.3144 / 0.3132 | 0.3126 / 0.3076 | 0.3050 / 0.3063        | 0.3064 / 0.3042        | 0.3078 / 0.3097        |
|                   | 1.00E-03 | 0.0914 / 0.0996 | 0.0974 / 0.1010 | 0.1026 / 0.0982        | 0.0962 / 0.0919        | 0.1028 / 0.1007        |
|                   | 1.00E-04 | 0.0347 / 0.0352 | 0.0277 / 0.0291 | 0.0343 / 0.0351        | 0.0325 / 0.0342        | 0.0354 / 0.0358        |
| Adam / Cosine     | 1.00E-02 | 0.4609 / 0.4665 | 0.3658 / 0.3695 | 0.4213 / 0.4251        | 0.3374 / 0.3329        | 0.4380 / 0.4720        |
|                   | 1.00E-03 | 0.6115 / 0.6233 | 0.6571 / 0.6157 | 0.6544 / 0.6422        | 0.6363 / 0.6228        | <b>0.6732 / 0.6505</b> |
|                   | 1.00E-04 | 0.5356 / 0.5254 | 0.6182 / 0.6039 | 0.6349 / 0.6013        | 0.6456 / 0.6236        | 0.6202 / 0.6316        |
|                   | 1.00E-05 | 0.0292 / 0.0285 | 0.4648 / 0.4427 | 0.4711 / 0.4573        | 0.4685 / 0.4450        | 0.4598 / 0.4357        |
|                   |          |                 |                 |                        |                        |                        |
|                   |          |                 |                 |                        |                        |                        |
| MobileNetV3 Small |          |                 |                 |                        |                        |                        |
|                   | lr \ wd  | 1.00E-03        | 1.00E-04        | 1.00E-05               | 1.00E-06               | 0                      |
| SGD / Step        | 1.00E-01 | 0.0460 / 0.0489 | 0.3649 / 0.3644 | 0.3952 / 0.3689        | <b>0.4012 / 0.3849</b> | 0.3825 / 0.3804        |
|                   | 1.00E-02 | 0.1561 / 0.1540 | 0.1735 / 0.1694 | 0.1805 / 0.1767        | 0.1772 / 0.1759        | 0.1811 / 0.1819        |
|                   | 1.00E-03 | 0.0698 / 0.0724 | 0.0612 / 0.0615 | 0.0618 / 0.0602        | 0.0630 / 0.0639        | 0.0585 / 0.0610        |
|                   | 1.00E-04 | 0.0411 / 0.0459 | 0.0455 / 0.0483 | 0.0431 / 0.0444        | 0.0490 / 0.0405        | 0.0431 / 0.0379        |
| SGD / Cosine      | 1.00E-01 | 0.0550 / 0.0547 | 0.3798 / 0.3822 | <b>0.4169 / 0.3816</b> | 0.3974 / 0.3795        | 0.3876 / 0.3705        |
|                   | 1.00E-02 | 0.1570 / 0.1499 | 0.1803 / 0.1768 | 0.1713 / 0.1676        | 0.1811 / 0.1811        | 0.1819 / 0.1781        |
|                   | 1.00E-03 | 0.0567 / 0.0580 | 0.0606 / 0.0633 | 0.0610 / 0.0613        | 0.0618 / 0.0657        | 0.0612 / 0.0611        |
|                   | 1.00E-04 | 0.0450 / 0.0466 | 0.0381 / 0.0431 | 0.0444 / 0.0422        | 0.0474 / 0.0474        | 0.0481 / 0.0492        |
| Adam / Cosine     | 1.00E-02 | 0.5261 / 0.5124 | 0.6086 / 0.5771 | 0.6011 / 0.5544        | 0.5785 / 0.5724        | 0.6096 / 0.5658        |
|                   | 1.00E-03 | 0.4112 / 0.3919 | 0.6066 / 0.604  | 0.6051 / 0.5744        | <b>0.6108 / 0.5608</b> | 0.5999 / 0.5929        |
|                   | 1.00E-04 | 0.0560 / 0.0588 | 0.4531 / 0.4085 | 0.4512 / 0.4416        | 0.4492 / 0.4314        | 0.4550 / 0.4412        |
|                   | 1.00E-05 | 0.0209 / 0.0209 | 0.1622 / 0.1560 | 0.1747 / 0.1800        | 0.1799 / 0.1799        | 0.1692 / 0.1787        |

|               |          |                 |                        |                 |                        |                        |
|---------------|----------|-----------------|------------------------|-----------------|------------------------|------------------------|
|               |          |                 |                        |                 |                        |                        |
|               |          |                 |                        |                 |                        |                        |
| DeiT Tiny     |          |                 |                        |                 |                        |                        |
|               | lr \ wd  | 1.00E-03        | 1.00E-04               | 1.00E-05        | 1.00E-06               | 0                      |
| SGD / Step    | 1.00E-01 | 0.0532 / 0.0539 | 0.5017 / 0.4673        | 0.4857 / 0.4876 | <b>0.5019 / 0.4730</b> | 0.4992 / 0.4915        |
|               | 1.00E-02 | 0.2739 / 0.2604 | 0.3169 / 0.3083        | 0.3336 / 0.3195 | 0.3244 / 0.3191        | 0.3448 / 0.3380        |
|               | 1.00E-03 | 0.1263 / 0.1240 | 0.1397 / 0.1385        | 0.1138 / 0.1132 | 0.1290 / 0.1188        | 0.1284 / 0.1339        |
|               | 1.00E-04 | 0.0387 / 0.0390 | 0.0396 / 0.0414        | 0.0336 / 0.0355 | 0.0343 / 0.0359        | 0.0332 / 0.0345        |
| SGD / Cosine  | 1.00E-01 | 0.0576 / 0.0559 | 0.5068 / 0.4632        | 0.4962 / 0.4808 | <b>0.5387 / 0.5119</b> | 0.4977 / 0.4844        |
|               | 1.00E-02 | 0.2723 / 0.2637 | 0.3446 / 0.3255        | 0.3291 / 0.3231 | 0.3345 / 0.3305        | 0.3246 / 0.3128        |
|               | 1.00E-03 | 0.1206 / 0.1255 | 0.1269 / 0.1371        | 0.1247 / 0.1295 | 0.1304 / 0.1331        | 0.1064 / 0.1062        |
|               | 1.00E-04 | 0.0371 / 0.0385 | 0.0317 / 0.0342        | 0.0380 / 0.0406 | 0.0393 / 0.0411        | 0.0343 / 0.0351        |
| Adam / Cosine | 1.00E-02 | 0.2721 / 0.2724 | 0.0832 / 0.0765        | 0.0629 / 0.0620 | 0.0822 / 0.0804        | 0.0722 / 0.0711        |
|               | 1.00E-03 | 0.2668 / 0.2555 | 0.5237 / 0.5056        | 0.4927 / 0.5205 | 0.5170 / 0.4651        | 0.5147 / 0.4828        |
|               | 1.00E-04 | 0.0555 / 0.0567 | <b>0.5777 / 0.5358</b> | 0.5628 / 0.4997 | 0.5571 / 0.5285        | 0.5407 / 0.5073        |
|               | 1.00E-05 | 0.0209 / 0.0209 | 0.2881 / 0.2686        | 0.3545 / 0.3604 | 0.3408 / 0.3290        | 0.3368 / 0.3336        |
|               |          |                 |                        |                 |                        |                        |
|               |          |                 |                        |                 |                        |                        |
| DeiT Small    |          |                 |                        |                 |                        |                        |
|               | lr \ wd  | 1.00E-03        | 1.00E-04               | 1.00E-05        | 1.00E-06               | 0                      |
| SGD / Step    | 1.00E-01 | 0.0488 / 0.0502 | 0.4905 / 0.5035        | 0.4874 / 0.4676 | <b>0.5230 / 0.5147</b> | 0.5185 / 0.5050        |
|               | 1.00E-02 | 0.2780 / 0.2703 | 0.3349 / 0.3321        | 0.3435 / 0.3159 | 0.3338 / 0.3275        | 0.3304 / 0.3301        |
|               | 1.00E-03 | 0.1331 / 0.1320 | 0.1212 / 0.1223        | 0.1240 / 0.1170 | 0.1330 / 0.1373        | 0.1354 / 0.1388        |
|               | 1.00E-04 | 0.0371 / 0.0392 | 0.0366 / 0.0360        | 0.0351 / 0.0345 | 0.0363 / 0.0364        | 0.0387 / 0.0391        |
| SGD / Cosine  | 1.00E-01 | 0.0502 / 0.0500 | 0.4988 / 0.4759        | 0.5163 / 0.4530 | 0.5081 / 0.4624        | <b>0.5329 / 0.5072</b> |
|               | 1.00E-02 | 0.2849 / 0.2643 | 0.3425 / 0.3311        | 0.3424 / 0.3403 | 0.3417 / 0.3473        | 0.3342 / 0.3294        |
|               | 1.00E-03 | 0.1185 / 0.1189 | 0.1204 / 0.1267        | 0.1340 / 0.1350 | 0.1275 / 0.1269        | 0.1383 / 0.1340        |
|               | 1.00E-04 | 0.0353 / 0.0365 | 0.0368 / 0.0371        | 0.0372 / 0.0394 | 0.0373 / 0.0383        | 0.0349 / 0.0342        |
| Adam / Cosine | 1.00E-02 | 0.2451 / 0.2363 | 0.0844 / 0.0831        | 0.0744 / 0.0748 | 0.0819 / 0.0826        | 0.0587 / 0.0627        |
|               | 1.00E-03 | 0.2839 / 0.2748 | 0.5357 / 0.5253        | 0.5048 / 0.4706 | 0.5425 / 0.5333        | 0.5446 / 0.5231        |
|               | 1.00E-04 | 0.0697 / 0.0725 | <b>0.6148 / 0.5959</b> | 0.5812 / 0.5881 | 0.5819 / 0.5627        | 0.6009 / 0.5650        |

|                     |          |                 |                      |                      |                      |                 |
|---------------------|----------|-----------------|----------------------|----------------------|----------------------|-----------------|
|                     | 1.00E-05 | 0.0209 / 0.0209 | 0.3388 / 0.3388      | 0.4029 / 0.3996      | 0.4090 / 0.4386      | 0.4275 / 0.4131 |
|                     |          |                 |                      |                      |                      |                 |
|                     |          |                 |                      |                      |                      |                 |
| Inception-ResNet v2 |          |                 |                      |                      |                      |                 |
|                     | lr \ wd  | 1.00E-03        | 1.00E-04             | 1.00E-05             | 1.00E-06             | 0               |
| SGD / Step          | 1.00E-01 | 0.2170/0.2105   | 0.4590/0.4339        | <b>0.4937/0.4904</b> | 0.4891/0.4438        | 0.4709/0.4672   |
|                     | 1.00E-02 | 0.1042/0.0985   | 0.1303/0.1252        | 0.1214/0.1219        | 0.1099/0.1114        | 0.1226/0.1175   |
|                     | 1.00E-03 | 0.0320/0.0324   | 0.0312/0.0325        | 0.0326/0.0331        | 0.0324/0.0345        | 0.0301/0.0326   |
|                     | 1.00E-04 | 0.0266/0.0274   | 0.0238/0.0242        | 0.0249/0.0241        | 0.0223/0.0221        | 0.0240/0.0245   |
| SGD / Cosine        | 1.00E-01 | 0.2305/0.2206   | 0.4650/0.4479        | 0.4803/0.4676        | <b>0.4899/0.4646</b> | 0.4876/0.4821   |
|                     | 1.00E-02 | 0.1037/0.0991   | 0.1281/0.1246        | 0.1217/0.1166        | 0.1364/0.1383        | 0.1208/0.1237   |
|                     | 1.00E-03 | 0.0323/0.0340   | 0.0347/0.0338        | 0.0308/0.0316        | 0.0311/0.0329        | 0.0335/0.0344   |
|                     | 1.00E-04 | 0.0272/0.0261   | 0.0237/0.0238        | 0.0248/0.0248        | 0.0225/0.0224        | 0.0243/0.0233   |
| Adam / Cosine       | 1.00E-02 | 0.5383/0.5326   | 0.4956/0.4962        | 0.4259/0.4134        | 0.3627/0.3535        | 0.4471/0.4588   |
|                     | 1.00E-03 | 0.6752/0.6496   | <b>0.6882/0.6515</b> | 0.6735/0.6581        | 0.6856/0.6256        | 0.6804/0.6572   |
|                     | 1.00E-04 | 0.3942/0.3953   | 0.5760/0.5504        | 0.5896/0.5547        | 0.5681/0.5570        | 0.5623/0.5776   |
|                     | 1.00E-05 | 0.0209/0.0209   | 0.2573/0.2443        | 0.2864/0.2690        | 0.2862/0.2759        | 0.2889/0.2832   |
|                     |          |                 |                      |                      |                      |                 |
|                     |          |                 |                      |                      |                      |                 |
| VGG-16 BN           |          |                 |                      |                      |                      |                 |
|                     | lr \ wd  | 1.00E-03        | 1.00E-04             | 1.00E-05             | 1.00E-06             | 0               |
| SGD / Step          | 1.00E-01 | 0.4479/0.4404   | <b>0.5897/0.5743</b> | 0.5495/0.5401        | 0.5696/0.5314        | 0.5658/0.5684   |
|                     | 1.00E-02 | 0.3484/0.3419   | 0.3431/0.3362        | 0.3433/0.3373        | 0.3332/0.3338        | 0.3312/0.3266   |
|                     | 1.00E-03 | 0.1122/0.1079   | 0.1192/0.1164        | 0.1177/0.1176        | 0.1217/0.1136        | 0.1299/0.1204   |
|                     | 1.00E-04 | 0.0362/0.0370   | 0.0318/0.0350        | 0.0402/0.0410        | 0.0339/0.0369        | 0.0342/0.0335   |
| SGD / Cosine        | 1.00E-01 | 0.4735/0.4615   | <b>0.5910/0.5566</b> | 0.5595/0.5779        | 0.5841/0.5322        | 0.5885/0.5723   |
|                     | 1.00E-02 | 0.3423/0.3428   | 0.3393/0.3342        | 0.3352/0.3321        | 0.3421/0.3364        | 0.3373/0.3365   |
|                     | 1.00E-03 | 0.1153/0.1119   | 0.1189/0.1168        | 0.1203/0.1164        | 0.1187/0.1184        | 0.1217/0.1114   |
|                     | 1.00E-04 | 0.0341/0.0350   | 0.0354/0.0372        | 0.0367/0.0355        | 0.0335/0.0351        | 0.0381/0.0380   |
| Adam / Cosine       | 1.00E-02 | 0.2066/0.2036   | 0.0374/0.0397        | 0.0477/0.0489        | 0.0209/0.0209        | 0.0209/0.0209   |
|                     | 1.00E-03 | 0.5336/0.5377   | 0.5605/0.5318        | 0.4898/0.4770        | 0.5433/0.4867        | 0.5391/0.5293   |

|                 |          |                      |               |                      |                      |                      |
|-----------------|----------|----------------------|---------------|----------------------|----------------------|----------------------|
|                 | 1.00E-04 | 0.6522/0.6343        | 0.6586/0.6374 | 0.6690/0.6447        | <b>0.6791/0.6503</b> | 0.6760/0.6538        |
|                 | 1.00E-05 | 0.2803/0.2823        | 0.4648/0.4538 | 0.4367/0.4445        | 0.4396/0.4411        | 0.4293/0.4238        |
|                 |          |                      |               |                      |                      |                      |
|                 |          |                      |               |                      |                      |                      |
| EfficientNet B0 |          |                      |               |                      |                      |                      |
|                 | lr \ wd  | 1.00E-03             | 1.00E-04      | 1.00E-05             | 1.00E-06             | 0                    |
| SGD / Step      | 1.00E-01 | 0.3650/0.3578        | 0.4755/0.4519 | <b>0.4779/0.4294</b> | 0.4363/0.4303        | 0.4637/0.4289        |
|                 | 1.00E-02 | 0.2068/0.1982        | 0.1942/0.1798 | 0.1632/0.1515        | 0.1792/0.1800        | 0.1932/0.1905        |
|                 | 1.00E-03 | 0.0803/0.0798        | 0.0818/0.0820 | 0.0762/0.0771        | 0.0709/0.0748        | 0.0774/0.0746        |
|                 | 1.00E-04 | 0.0525/0.0480        | 0.0500/0.0492 | 0.0601/0.0562        | 0.0565/0.0500        | 0.0567/0.0573        |
| SGD / Cosine    | 1.00E-01 | 0.3904/0.3942        | 0.4825/0.4468 | 0.4523/0.4601        | 0.4467/0.4568        | <b>0.4941/0.4520</b> |
|                 | 1.00E-02 | 0.2202/0.1977        | 0.1908/0.1875 | 0.1819/0.1641        | 0.1843/0.1743        | 0.1692/0.1673        |
|                 | 1.00E-03 | 0.0728/0.0811        | 0.0786/0.0770 | 0.0793/0.0735        | 0.0799/0.0800        | 0.0732/0.0758        |
|                 | 1.00E-04 | 0.0478/0.0426        | 0.0551/0.0564 | 0.0563/0.0577        | 0.0512/0.0518        | 0.0517/0.0519        |
| Adam / Cosine   | 1.00E-02 | 0.5242/0.5128        | 0.6493/0.5415 | 0.6282/0.5743        | 0.5838/0.5642        | 0.6026/0.5860        |
|                 | 1.00E-03 | 0.5312/0.5755        | 0.6832/0.6652 | 0.6735/0.6461        | <b>0.6942/0.6467</b> | 0.6812/0.6333        |
|                 | 1.00E-04 | 0.4056/0.4008        | 0.5413/0.5474 | 0.5074/0.5275        | 0.5158/0.4879        | 0.5066/0.4992        |
|                 | 1.00E-05 | 0.0985/0.1031        | 0.2040/0.2025 | 0.1679/0.1627        | 0.1669/0.1640        | 0.1661/0.1583        |
|                 |          |                      |               |                      |                      |                      |
|                 |          |                      |               |                      |                      |                      |
| EfficientNet B4 |          |                      |               |                      |                      |                      |
|                 | lr \ wd  | 1.00E-03             | 1.00E-04      | 1.00E-05             | 1.00E-06             | 0                    |
| SGD / Step      | 1.00E-01 | <b>0.3590/0.3463</b> | 0.1562/0.1518 | 0.1281/0.1250        | 0.1343/0.1306        | 0.1261/0.1246        |
|                 | 1.00E-02 | 0.0516/0.0538        | 0.0521/0.0547 | 0.0535/0.0503        | 0.0579/0.0577        | 0.0520/0.0506        |
|                 | 1.00E-03 | 0.0408/0.0438        | 0.0476/0.0468 | 0.0497/0.0617        | 0.0411/0.0374        | 0.0404/0.0535        |
|                 | 1.00E-04 | 0.0372/0.0344        | 0.0338/0.0284 | 0.0342/0.0328        | 0.0286/0.0302        | 0.0312/0.0325        |
| SGD / Cosine    | 1.00E-01 | <b>0.3776/0.3674</b> | 0.1591/0.1472 | 0.1242/0.1189        | 0.1264/0.1166        | 0.1219/0.1217        |
|                 | 1.00E-02 | 0.0587/0.0612        | 0.0537/0.0555 | 0.0536/0.0536        | 0.0535/0.0543        | 0.0586/0.0557        |
|                 | 1.00E-03 | 0.0427/0.0399        | 0.0444/0.0477 | 0.0405/0.0424        | 0.0421/0.0436        | 0.0482/0.0454        |
|                 | 1.00E-04 | 0.0319/0.0302        | 0.0361/0.0286 | 0.0374/0.0377        | 0.0297/0.0317        | 0.0340/0.0370        |
| Adam / Cosine   | 1.00E-02 | 0.6497/0.6190        | 0.6829/0.6752 | <b>0.6954/0.6458</b> | 0.6842/0.6600        | 0.6802/0.6664        |

|                  |          |               |                      |                      |                      |                      |               |
|------------------|----------|---------------|----------------------|----------------------|----------------------|----------------------|---------------|
|                  |          | 1.00E-03      | 0.6602/0.6408        | 0.6662/0.6173        | 0.6385/0.6308        | 0.6217/0.6175        | 0.6445/0.6234 |
|                  |          | 1.00E-04      | 0.5580/0.5372        | 0.4347/0.3836        | 0.3734/0.3961        | 0.3906/0.3500        | 0.3843/0.3711 |
|                  |          | 1.00E-05      | 0.1991/0.1976        | 0.1369/0.1298        | 0.0913/0.0929        | 0.0907/0.0840        | 0.0925/0.0860 |
|                  |          |               |                      |                      |                      |                      |               |
|                  |          |               |                      |                      |                      |                      |               |
| DenseNet-121     |          |               |                      |                      |                      |                      |               |
|                  | lr \ wd  | 1.00E-03      | 1.00E-04             | 1.00E-05             | 1.00E-06             | 0                    |               |
| SGD / Step       | 1.00E-01 | 0.4183/0.4132 | 0.6017/0.5768        | 0.5841/0.5258        | 0.5943/0.5474        | <b>0.6108/0.5245</b> |               |
|                  | 1.00E-02 | 0.3166/0.3040 | 0.3092/0.3053        | 0.3103/0.2935        | 0.3038/0.2997        | 0.3041/0.3060        |               |
|                  | 1.00E-03 | 0.1036/0.1048 | 0.1099/0.1037        | 0.1074/0.1052        | 0.1130/0.1124        | 0.1054/0.0993        |               |
|                  | 1.00E-04 | 0.0360/0.0417 | 0.0394/0.0395        | 0.0422/0.0427        | 0.0406/0.0388        | 0.0427/0.0432        |               |
| SGD / Cosine     | 1.00E-01 | 0.4382/0.4300 | 0.5786/0.5802        | <b>0.5985/0.5756</b> | 0.5818/0.5633        | 0.5834/0.5703        |               |
|                  | 1.00E-02 | 0.3129/0.3112 | 0.3060/0.3014        | 0.3052/0.3040        | 0.3043/0.2999        | 0.3116/0.3036        |               |
|                  | 1.00E-03 | 0.1060/0.1000 | 0.1083/0.1093        | 0.1040/0.1042        | 0.1067/0.1055        | 0.1112/0.1061        |               |
|                  | 1.00E-04 | 0.0381/0.0406 | 0.0417/0.0448        | 0.0416/0.0434        | 0.0383/0.0373        | 0.0370/0.0359        |               |
| Adam / Cosine    | 1.00E-02 | 0.5421/0.5111 | 0.4220/0.4199        | 0.4571/0.4638        | 0.4690/0.4751        | 0.4032/0.3903        |               |
|                  | 1.00E-03 | 0.6412/0.6251 | 0.6912/0.6189        | 0.6905/0.6368        | <b>0.7019/0.6557</b> | 0.7008/0.6745        |               |
|                  | 1.00E-04 | 0.4329/0.4267 | 0.6031/0.6052        | 0.6260/0.5976        | 0.6382/0.5835        | 0.6328/0.6059        |               |
|                  | 1.00E-05 | 0.0209/0.0209 | 0.3630/0.3539        | 0.3464/0.3294        | 0.3525/0.3425        | 0.3547/0.3508        |               |
|                  |          |               |                      |                      |                      |                      |               |
|                  |          |               |                      |                      |                      |                      |               |
| ResNeXt-50-32x4d |          |               |                      |                      |                      |                      |               |
|                  | lr \ wd  | 1.00E-03      | 1.00E-04             | 1.00E-05             | 1.00E-06             | 0                    |               |
| SGD / Step       | 1.00E-01 | 0.4089/0.3975 | <b>0.6567/0.6385</b> | 0.6425/0.6117        | 0.6482/0.5962        | 0.6395/0.6164        |               |
|                  | 1.00E-02 | 0.3586/0.3533 | 0.3489/0.3358        | 0.3488/0.3310        | 0.3567/0.3490        | 0.3464/0.3441        |               |
|                  | 1.00E-03 | 0.1116/0.1100 | 0.1091/0.1022        | 0.1082/0.1068        | 0.1066/0.1085        | 0.1133/0.1076        |               |
|                  | 1.00E-04 | 0.0349/0.0351 | 0.0338/0.0346        | 0.0336/0.0350        | 0.0310/0.0324        | 0.0329/0.0338        |               |
| SGD / Cosine     | 1.00E-01 | 0.4394/0.4306 | 0.6204/0.6174        | 0.6192/0.5876        | 0.6363/0.6353        | <b>0.6452/0.6253</b> |               |
|                  | 1.00E-02 | 0.3549/0.3547 | 0.3537/0.3430        | 0.3550/0.3440        | 0.3497/0.3451        | 0.3472/0.3401        |               |
|                  | 1.00E-03 | 0.1068/0.1007 | 0.1112/0.1090        | 0.1146/0.1125        | 0.1103/0.1100        | 0.1101/0.1050        |               |
|                  | 1.00E-04 | 0.0341/0.0334 | 0.0328/0.0314        | 0.0333/0.0342        | 0.0312/0.0316        | 0.0330/0.0326        |               |

|                    |          |                      |                      |               |                      |                      |
|--------------------|----------|----------------------|----------------------|---------------|----------------------|----------------------|
| Adam / Cosine      | 1.00E-02 | 0.4380/0.4240        | 0.4862/0.4868        | 0.4583/0.4784 | 0.4701/0.4802        | 0.4638/0.4615        |
|                    | 1.00E-03 | 0.6217/0.5844        | 0.6816/0.6671        | 0.6813/0.6729 | 0.6857/0.6530        | <b>0.6906/0.6654</b> |
|                    | 1.00E-04 | 0.5306/0.5272        | 0.6501/0.6315        | 0.6790/0.6493 | 0.6432/0.6303        | 0.6502/0.6317        |
|                    | 1.00E-05 | 0.0267/0.0259        | 0.4729/0.4507        | 0.4587/0.4429 | 0.4588/0.4440        | 0.4730/0.4665        |
|                    |          |                      |                      |               |                      |                      |
|                    |          |                      |                      |               |                      |                      |
| ShuffleNet v2 x1.0 |          |                      |                      |               |                      |                      |
|                    | lr \ wd  | 1.00E-03             | 1.00E-04             | 1.00E-05      | 1.00E-06             | 0                    |
| SGD / Step         | 1.00E-01 | <b>0.2093/0.2103</b> | 0.1600/0.1652        | 0.1616/0.1652 | 0.1626/0.1647        | 0.1523/0.1495        |
|                    | 1.00E-02 | 0.0209/0.0209        | 0.0258/0.0267        | 0.0260/0.0269 | 0.0210/0.0210        | 0.0209/0.0209        |
|                    | 1.00E-03 | 0.0209/0.0209        | 0.0209/0.0209        | 0.0209/0.0209 | 0.0209/0.0209        | 0.0209/0.0209        |
|                    | 1.00E-04 | 0.0200/0.0180        | 0.0229/0.0207        | 0.0150/0.0160 | 0.0250/0.0225        | 0.0103/0.0111        |
| SGD / Cosine       | 1.00E-01 | <b>0.2385/0.2374</b> | 0.1559/0.1599        | 0.1604/0.1655 | 0.1578/0.1609        | 0.1534/0.1536        |
|                    | 1.00E-02 | 0.0262/0.0278        | 0.0213/0.0206        | 0.0216/0.0220 | 0.0211/0.0211        | 0.0260/0.0283        |
|                    | 1.00E-03 | 0.0209/0.0209        | 0.0209/0.0209        | 0.0210/0.0211 | 0.0209/0.0209        | 0.0209/0.0209        |
|                    | 1.00E-04 | 0.0272/0.0263        | 0.0319/0.0322        | 0.0204/0.0209 | 0.0178/0.0192        | 0.0210/0.0209        |
| Adam / Cosine      | 1.00E-02 | 0.5665/0.5091        | 0.6134/0.5425        | 0.5966/0.5693 | 0.5878/0.5715        | 0.6120/0.5829        |
|                    | 1.00E-03 | 0.5811/0.5964        | <b>0.6202/0.6037</b> | 0.5811/0.5658 | 0.5990/0.5707        | 0.6000/0.5483        |
|                    | 1.00E-04 | 0.3129/0.3041        | 0.3374/0.3331        | 0.3490/0.3426 | 0.3415/0.3423        | 0.3427/0.3439        |
|                    | 1.00E-05 | 0.0209/0.0209        | 0.0293/0.0288        | 0.0420/0.0419 | 0.0422/0.0427        | 0.0435/0.0441        |
|                    |          |                      |                      |               |                      |                      |
|                    |          |                      |                      |               |                      |                      |
| ConvNext tiny      |          |                      |                      |               |                      |                      |
|                    | lr \ wd  | 1.00E-03             | 1.00E-04             | 1.00E-05      | 1.00E-06             | 0                    |
| SGD / Step         | 1.00E-01 | 0.0531/0.0547        | 0.4418/0.4631        | 0.4679/0.4717 | <b>0.4827/0.4770</b> | 0.4741/0.4674        |
|                    | 1.00E-02 | 0.1440/0.1421        | 0.2516/0.2446        | 0.2316/0.2170 | 0.2166/0.2160        | 0.2385/0.2249        |
|                    | 1.00E-03 | 0.0360/0.0365        | 0.0405/0.0414        | 0.0338/0.0353 | 0.0395/0.0370        | 0.0411/0.0419        |
|                    | 1.00E-04 | 0.0244/0.0240        | 0.0249/0.0250        | 0.0264/0.0254 | 0.0268/0.0230        | 0.0225/0.0234        |
| SGD / Cosine       | 1.00E-01 | 0.0670/0.0658        | 0.4538/0.4548        | 0.4609/0.4420 | <b>0.4881/0.4894</b> | 0.4658/0.4682        |
|                    | 1.00E-02 | 0.1531/0.1513        | 0.2320/0.2264        | 0.2501/0.2369 | 0.2477/0.2433        | 0.2283/0.2233        |
|                    | 1.00E-03 | 0.0455/0.0454        | 0.0430/0.0415        | 0.0352/0.0366 | 0.0389/0.0381        | 0.0340/0.0350        |



|                    |         |          |                      |                      |                      |               |                      |
|--------------------|---------|----------|----------------------|----------------------|----------------------|---------------|----------------------|
|                    |         | 1.00E-04 | 0.0243/0.0228        | 0.0251/0.0250        | 0.0235/0.0234        | 0.0285/0.0283 | 0.0245/0.0233        |
| Adam / Cosine      |         | 1.00E-02 | 0.0209/0.0209        | 0.0209/0.0209        | 0.0209/0.0209        | 0.0209/0.0209 | 0.0209/0.0209        |
|                    |         | 1.00E-03 | 0.5160/0.4703        | 0.6591/0.6543        | 0.6768/0.649         | 0.6668/0.6427 | <b>0.6992/0.6666</b> |
|                    |         | 1.00E-04 | 0.0526/0.0518        | 0.621/0.5855         | 0.6424/0.6231        | 0.6479/0.6314 | 0.6502/0.5969        |
|                    |         | 1.00E-05 | 0.0209/0.0209        | 0.3168/0.3026        | 0.3735/0.3640        | 0.3865/0.3820 | 0.3797/0.3746        |
|                    |         |          |                      |                      |                      |               |                      |
|                    |         |          |                      |                      |                      |               |                      |
| ShuffleNet_V2_X0_5 |         |          |                      |                      |                      |               |                      |
|                    | lr \ wd |          | 1.00E-03             | 1.00E-04             | 1.00E-05             | 1.00E-06      | 0                    |
| SGD / Step         |         | 1.00E-01 | <b>0.1258/0.1287</b> | 0.1201/0.1224        | 0.1238/0.128         | 0.1201/0.1196 | 0.1232/0.1242        |
|                    |         | 1.00E-02 | 0.0280/0.0293        | 0.0311/0.0322        | 0.0262/0.0274        | 0.0300/0.0313 | 0.0314/0.0329        |
|                    |         | 1.00E-03 | 0.0209/0.0209        | 0.0209/0.0209        | 0.0209/0.0209        | 0.0209/0.0209 | 0.0210/0.0209        |
|                    |         | 1.00E-04 | 0.0277/0.0282        | 0.0360/0.0388        | 0.0165/0.0173        | 0.0275/0.0311 | 0.0236/0.0235        |
| SGD / Cosine       |         | 1.00E-01 | <b>0.1272/0.1284</b> | 0.1231/0.1249        | 0.1199/0.1232        | 0.1128/0.1150 | 0.1152/0.1165        |
|                    |         | 1.00E-02 | 0.0258/0.0269        | 0.0292/0.0296        | 0.0296/0.0308        | 0.0327/0.0336 | 0.0277/0.0290        |
|                    |         | 1.00E-03 | 0.0214/0.0211        | 0.0209/0.0209        | 0.0209/0.0209        | 0.0209/0.0209 | 0.0209/0.0209        |
|                    |         | 1.00E-04 | 0.0233/0.0226        | 0.0216/0.0222        | 0.0054/0.0092        | 0.0266/0.0257 | 0.0237/0.0259        |
| Adam / Cosine      |         | 1.00E-02 | 0.4953/0.4717        | <b>0.5867/0.5679</b> | 0.5593/0.5595        | 0.5665/0.5460 | 0.5672/0.5367        |
|                    |         | 1.00E-03 | 0.5241/0.5172        | 0.5225/0.4952        | 0.5340/0.4676        | 0.5156/0.4931 | 0.5390/0.5002        |
|                    |         | 1.00E-04 | 0.2267/0.2254        | 0.2530/0.2477        | 0.2395/0.2364        | 0.2546/0.2506 | 0.2503/0.2450        |
|                    |         | 1.00E-05 | 0.0209/0.0209        | 0.0264/0.0286        | 0.0354/0.0362        | 0.0340/0.0354 | 0.0358/0.0366        |
|                    |         |          |                      |                      |                      |               |                      |
|                    |         |          |                      |                      |                      |               |                      |
| SqueezeNet1_1      |         |          |                      |                      |                      |               |                      |
|                    | lr \ wd |          | 1.00E-03             | 1.00E-04             | 1.00E-05             | 1.00E-06      | 0                    |
| SGD / Step         |         | 1.00E-01 | 0.0232/0.0233        | 0.0953/0.0952        | 0.1058/0.1045        | 0.1133/0.1167 | 0.0209/0.0209        |
|                    |         | 1.00E-02 | 0.0608/0.0603        | 0.1226/0.1208        | <b>0.1354/0.1382</b> | 0.1037/0.1086 | 0.1284/0.1269        |
|                    |         | 1.00E-03 | 0.0498/0.0485        | 0.0635/0.0628        | 0.0456/0.0455        | 0.0582/0.0574 | 0.0578/0.0558        |
|                    |         | 1.00E-04 | 0.0358/0.0362        | 0.0355/0.0386        | 0.0359/0.0377        | 0.0324/0.0346 | 0.0348/0.0346        |
| SGD / Cosine       |         | 1.00E-01 | 0.0232/0.0233        | 0.0885/0.0914        | 0.0209/0.0209        | 0.025/0.0252  | -1./-1.              |
|                    |         | 1.00E-02 | 0.0766/0.0793        | 0.1235/0.1232        | <b>0.1913/0.1818</b> | 0.1197/0.1180 | 0.1183/0.1228        |

|               |          |               |               |                     |               |               |
|---------------|----------|---------------|---------------|---------------------|---------------|---------------|
|               | 1.00E-03 | 0.0570/0.0619 | 0.0611/0.0619 | 0.0570/0.0567       | 0.0580/0.0641 | 0.0506/0.0529 |
|               | 1.00E-04 | 0.0364/0.0371 | 0.0374/0.0376 | 0.0325/0.0336       | 0.0365/0.0373 | 0.0393/0.0398 |
| Adam / Cosine | 1.00E-02 | 0.0209/0.0209 | 0.0898/0.0957 | 0.0209/0.0209       | 0.0348/0.0367 | 0.0209/0.0209 |
|               | 1.00E-03 | 0.0602/0.0621 | 0.3607/0.3412 | <b>0.3972/0.398</b> | 0.3476/0.3437 | 0.3669/0.3871 |
|               | 1.00E-04 | 0.0367/0.0382 | 0.2856/0.2757 | 0.3042/0.3155       | 0.3212/0.2963 | 0.294/0.2835  |
|               | 1.00E-05 | 0.0209/0.0209 | 0.0891/0.0888 | 0.1052/0.1017       | 0.1092/0.1094 | 0.0964/0.0959 |
