# Supplementary material
Source: ML conference proceedings conference paper supplement (https://openreview.net/forum?id=7T2XgpklLDA)
Supplement: supplementary_material [file attachment]

|               |          |              |              |              |              |              |
|---------------|----------|--------------|--------------|--------------|--------------|--------------|
| Resnet50      |          |              |              |              |              |              |
|               | lr \ wd  | 1.00E-03     | 1.00E-04     | 1.00E-05     | 1.00E-06     | 0            |
| SGD / Step    | 1.00E-01 | 47.09        | 46.05        | 47.40        | 49.79        | 46.86        |
|               | 1.00E-02 | 72.47        | <b>72.70</b> | 70.65        | 71.04        | 70.98        |
|               | 1.00E-03 | 70.46        | 69.60        | 70.39        | 70.08        | 70.63        |
|               | 1.00E-04 | 61.29        | 61.45        | 60.87        | 62.00        | 61.00        |
| SGD / Cosine  | 1.00E-01 | 47.83        | 46.28        | 45.07        | 48.65        | 46.93        |
|               | 1.00E-02 | <b>73.96</b> | 72.51        | 72.49        | 73.34        | 72.46        |
|               | 1.00E-03 | 69.16        | 70.44        | 70.06        | 70.40        | 70.23        |
|               | 1.00E-04 | 58.71        | 59.03        | 58.35        | 58.02        | 59.24        |
| Adam / Cosine | 1.00E-02 | 54.99        | 49.76        | 50.07        | 51.22        | 46.47        |
|               | 1.00E-03 | 71.22        | 70.86        | 72.19        | <b>72.70</b> | 71.94        |
|               | 1.00E-04 | 70.30        | 70.38        | 71.27        | 70.98        | 72.38        |
|               | 1.00E-05 | 68.05        | 68.91        | 69.55        | 69.94        | 69.42        |
|               |          |              |              |              |              |              |
|               |          |              |              |              |              |              |
| AlexNet       |          |              |              |              |              |              |
|               | lr \ wd  | 1.00E-03     | 1.00E-04     | 1.00E-05     | 1.00E-06     | 0            |
| SGD / Step    | 1.00E-01 | 29.81        | 29.81        | 29.81        | 29.81        | 29.81        |
|               | 1.00E-02 | 60.58        | 61.68        | 62.19        | 61.87        | 62.15        |
|               | 1.00E-03 | 59.43        | 61.74        | 59.55        | 61.57        | <b>62.48</b> |
|               | 1.00E-04 | 57.82        | 58.25        | 56.76        | 59.34        | 58.99        |
| SGD / Cosine  | 1.00E-01 | 29.81        | 29.81        | 29.81        | 29.81        | 29.81        |
|               | 1.00E-02 | 57.38        | 58.58        | 59.01        | 60.03        | 58.75        |
|               | 1.00E-03 | 61.31        | 59.26        | 60.80        | 61.17        | <b>62.95</b> |
|               | 1.00E-04 | 57.82        | 58.74        | 56.31        | 57.22        | 56.94        |
| Adam / Cosine | 1.00E-02 | 29.81        | 29.81        | 29.81        | 29.81        | 29.81        |
|               | 1.00E-03 | 59.67        | 54.76        | 56.88        | 53.37        | 53.53        |
|               | 1.00E-04 | 56.05        | 62.29        | <b>63.59</b> | 61.51        | 62.91        |
|               | 1.00E-05 | 45.61        | 58.48        | 56.62        | 60.03        | 60.24        |
|               |          |              |              |              |              |              |
|               |          |              |              |              |              |              |

|               |          |              |          |              |              |              |
|---------------|----------|--------------|----------|--------------|--------------|--------------|
| VGG13BN       |          |              |          |              |              |              |
|               | lr \ wd  | 1.00E-03     | 1.00E-04 | 1.00E-05     | 1.00E-06     | 0            |
| SGD / Step    | 1.00E-01 | 72.17        | 73.60    | 73.32        | 73.34        | 73.59        |
|               | 1.00E-02 | 73.76        | 73.12    | 73.66        | 74.08        | <b>74.72</b> |
|               | 1.00E-03 | 71.71        | 71.34    | 70.86        | 70.52        | 71.42        |
|               | 1.00E-04 | 61.22        | 60.79    | 60.22        | 61.14        | 60.23        |
| SGD / Cosine  | 1.00E-01 | 72.24        | 71.57    | 71.56        | 71.92        | 63.72        |
|               | 1.00E-02 | <b>74.53</b> | 74.00    | 74.14        | 73.62        | 73.49        |
|               | 1.00E-03 | 71.30        | 70.42    | 70.56        | 71.23        | 70.38        |
|               | 1.00E-04 | 58.63        | 59.33    | 59.31        | 59.11        | 55.88        |
| Adam / Cosine | 1.00E-02 | 29.81        | 45.34    | 40.33        | 29.81        | 43.66        |
|               | 1.00E-03 | 72.88        | 72.72    | 71.42        | 72.63        | 71.24        |
|               | 1.00E-04 | 72.79        | 74.69    | 74.02        | <b>75.06</b> | 74.17        |
|               | 1.00E-05 | 70.22        | 70.93    | 69.78        | 70.38        | 71.08        |
|               |          |              |          |              |              |              |
|               |          |              |          |              |              |              |
| PNASNet5      |          |              |          |              |              |              |
|               | lr \ wd  | 1.00E-03     | 1.00E-04 | 1.00E-05     | 1.00E-06     | 0            |
| SGD / Step    | 1.00E-01 | 71.04        | 70.10    | 71.55        | 70.32        | 71.05        |
|               | 1.00E-02 | 71.78        | 70.75    | <b>72.03</b> | 71.99        | 71.22        |
|               | 1.00E-03 | 69.60        | 69.08    | 69.31        | 69.37        | 68.31        |
|               | 1.00E-04 | 59.06        | 59.84    | 59.30        | 60.00        | 58.60        |
| SGD / Cosine  | 1.00E-01 | 69.42        | 70.98    | 71.51        | 72.78        | 72.11        |
|               | 1.00E-02 | 72.06        | 72.66    | <b>73.41</b> | 72.07        | 71.86        |
|               | 1.00E-03 | 68.39        | 68.50    | 67.78        | 68.27        | 68.62        |
|               | 1.00E-04 | 57.94        | 57.55    | 57.84        | 58.50        | 59.22        |
| Adam / Cosine | 1.00E-02 | 53.02        | 49.10    | 59.80        | 52.69        | 53.60        |
|               | 1.00E-03 | 71.24        | 73.05    | <b>75.21</b> | 71.98        | 72.73        |
|               | 1.00E-04 | 64.63        | 70.90    | 73.03        | 70.06        | 72.24        |
|               | 1.00E-05 | 42.99        | 69.51    | 69.42        | 72.53        | 69.45        |
|               |          |              |          |              |              |              |

|                   |          |          |              |              |              |              |
|-------------------|----------|----------|--------------|--------------|--------------|--------------|
|                   |          |          |              |              |              |              |
| Resnet152         |          |          |              |              |              |              |
|                   | lr \ wd  | 1.00E-03 | 1.00E-04     | 1.00E-05     | 1.00E-06     | 0            |
| SGD / Step        | 1.00E-01 | 47.32    | 46.55        | 50.13        | 48.33        | 49.79        |
|                   | 1.00E-02 | 71.81    | 71.96        | 72.28        | <b>73.43</b> | 73.10        |
|                   | 1.00E-03 | 73.26    | 72.53        | 72.74        | 72.72        | 72.30        |
|                   | 1.00E-04 | 65.12    | 66.26        | 64.90        | 65.99        | 65.29        |
| SGD / Cosine      | 1.00E-01 | 49.08    | 48.06        | 44.44        | 48.49        | 47.17        |
|                   | 1.00E-02 | 73.99    | <b>74.05</b> | 73.36        | 72.86        | 72.26        |
|                   | 1.00E-03 | 72.70    | 73.29        | 73.26        | 72.21        | 72.95        |
|                   | 1.00E-04 | 62.56    | 63.30        | 63.80        | 62.50        | 63.46        |
| Adam / Cosine     | 1.00E-02 | 52.30    | 47.72        | 45.55        | 48.72        | 50.94        |
|                   | 1.00E-03 | 70.92    | 69.43        | 69.93        | 71.35        | 70.46        |
|                   | 1.00E-04 | 70.56    | 71.70        | 72.93        | 72.03        | 72.52        |
|                   | 1.00E-05 | 60.79    | 72.14        | 72.18        | 70.87        | <b>73.09</b> |
|                   |          |          |              |              |              |              |
|                   |          |          |              |              |              |              |
|                   |          |          |              |              |              |              |
| MobileNetV3 Small |          |          |              |              |              |              |
|                   | lr \ wd  | 1.00E-03 | 1.00E-04     | 1.00E-05     | 1.00E-06     | 0            |
| SGD / Step        | 1.00E-01 | 60.42    | 64.44        | 63.82        | 63.47        | 63.59        |
|                   | 1.00E-02 | 64.63    | 63.56        | <b>65.32</b> | 63.85        | 63.99        |
|                   | 1.00E-03 | 62.08    | 62.76        | 62.80        | 60.07        | 60.32        |
|                   | 1.00E-04 | 50.31    | 50.79        | 50.97        | 50.19        | 49.67        |
| SGD / Cosine      | 1.00E-01 | 64.40    | 64.80        | 64.13        | 64.73        | 64.04        |
|                   | 1.00E-02 | 64.01    | 64.08        | 63.56        | <b>64.83</b> | 63.92        |
|                   | 1.00E-03 | 59.79    | 61.26        | 58.74        | 58.90        | 60.58        |
|                   | 1.00E-04 | 48.36    | 48.93        | 49.34        | 50.08        | 48.60        |
| Adam / Cosine     | 1.00E-02 | 64.65    | <b>66.01</b> | 63.38        | 61.35        | 61.33        |
|                   | 1.00E-03 | 64.75    | 64.05        | 64.74        | 63.39        | 63.21        |
|                   | 1.00E-04 | 53.13    | 62.94        | 62.48        | 62.64        | 63.71        |
|                   | 1.00E-05 | 41.06    | 54.60        | 52.30        | 53.34        | 55.23        |

|               |          |          |              |          |              |              |
|---------------|----------|----------|--------------|----------|--------------|--------------|
|               |          |          |              |          |              |              |
|               |          |          |              |          |              |              |
| DeiT Tiny     |          |          |              |          |              |              |
|               | lr \ wd  | 1.00E-03 | 1.00E-04     | 1.00E-05 | 1.00E-06     | 0            |
| SGD / Step    | 1.00E-01 | 40.55    | 31.62        | 38.22    | 31.77        | 35.27        |
|               | 1.00E-02 | 63.58    | 63.67        | 63.56    | 63.19        | 63.42        |
|               | 1.00E-03 | 66.56    | 65.70        | 64.76    | <b>66.93</b> | 65.57        |
|               | 1.00E-04 | 63.48    | 62.00        | 63.00    | 63.70        | 62.08        |
| SGD / Cosine  | 1.00E-01 | 46.22    | 32.01        | 31.99    | 30.75        | 31.43        |
|               | 1.00E-02 | 63.73    | 64.85        | 64.39    | 64.17        | 63.34        |
|               | 1.00E-03 | 65.65    | <b>68.77</b> | 65.63    | 66.87        | 67.28        |
|               | 1.00E-04 | 60.45    | 60.11        | 60.50    | 61.40        | 59.57        |
| Adam / Cosine | 1.00E-02 | 44.34    | 39.93        | 39.20    | 38.99        | 38.81        |
|               | 1.00E-03 | 48.35    | 51.44        | 54.51    | 50.00        | 50.37        |
|               | 1.00E-04 | 45.53    | 65.05        | 66.28    | 65.55        | <b>66.61</b> |
|               | 1.00E-05 | 38.64    | 62.06        | 64.86    | 64.11        | 63.39        |
|               |          |          |              |          |              |              |
|               |          |          |              |          |              |              |
| DeiT Small    |          |          |              |          |              |              |
|               | lr \ wd  | 1.00E-03 | 1.00E-04     | 1.00E-05 | 1.00E-06     | 0            |
| SGD / Step    | 1.00E-01 | 29.81    | 29.81        | 42.29    | 29.81        | 29.81        |
|               | 1.00E-02 | 67.68    | 68.43        | 69.06    | 67.24        | 67.46        |
|               | 1.00E-03 | 70.37    | <b>71.41</b> | 68.96    | 70.75        | 70.46        |
|               | 1.00E-04 | 63.31    | 62.39        | 63.72    | 62.37        | 61.49        |
| SGD / Cosine  | 1.00E-01 | 29.98    | 29.35        | 34.52    | 29.50        | 31.49        |
|               | 1.00E-02 | 68.21    | 67.33        | 68.47    | 68.24        | 68.72        |
|               | 1.00E-03 | 68.64    | 68.56        | 68.97    | 67.95        | <b>69.31</b> |
|               | 1.00E-04 | 63.89    | 63.71        | 62.12    | 63.50        | 63.37        |
| Adam / Cosine | 1.00E-02 | 46.43    | 37.59        | 38.56    | 37.63        | 35.98        |
|               | 1.00E-03 | 45.88    | 47.93        | 47.95    | 48.52        | 46.76        |
|               | 1.00E-04 | 47.42    | 69.46        | 68.75    | <b>70.61</b> | 70.29        |

|                     |          |              |              |              |              |              |
|---------------------|----------|--------------|--------------|--------------|--------------|--------------|
|                     | 1.00E-05 | 37.85        | 65.40        | 67.31        | 66.22        | 69.08        |
|                     |          |              |              |              |              |              |
|                     |          |              |              |              |              |              |
| Inception-ResNet v2 |          |              |              |              |              |              |
|                     | lr \ wd  | 1.00E-03     | 1.00E-04     | 1.00E-05     | 1.00E-06     | 0            |
| SGD / Step          | 1.00E-01 | <b>70.59</b> | 69.16        | 69.02        | 70.43        | 69.88        |
|                     | 1.00E-02 | 70.50        | 70.42        | 70.00        | 70.30        | 69.27        |
|                     | 1.00E-03 | 66.82        | 68.75        | 66.62        | 67.59        | 66.81        |
|                     | 1.00E-04 | 50.02        | 49.66        | 50.96        | 51.13        | 51.41        |
| SGD / Cosine        | 1.00E-01 | 69.31        | 70.31        | <b>70.68</b> | 68.68        | 70.23        |
|                     | 1.00E-02 | 69.46        | 69.19        | 70.50        | 69.05        | 68.20        |
|                     | 1.00E-03 | 67.35        | 66.86        | 66.83        | 67.76        | 67.05        |
|                     | 1.00E-04 | 49.22        | 51.02        | 50.52        | 50.88        | 50.07        |
| Adam / Cosine       | 1.00E-02 | 67.16        | 59.45        | 63.23        | 59.61        | 64.12        |
|                     | 1.00E-03 | 70.17        | 69.94        | 69.31        | <b>70.33</b> | 69.69        |
|                     | 1.00E-04 | 66.37        | 67.48        | 69.11        | 69.71        | 69.85        |
|                     | 1.00E-05 | 60.81        | 66.62        | 67.18        | 63.97        | 65.45        |
|                     |          |              |              |              |              |              |
|                     |          |              |              |              |              |              |
| VGG-16 BN           |          |              |              |              |              |              |
|                     | lr \ wd  | 1.00E-03     | 1.00E-04     | 1.00E-05     | 1.00E-06     | 0            |
| SGD / Step          | 1.00E-01 | 64.75        | 71.85        | 66.50        | 53.34        | 47.49        |
|                     | 1.00E-02 | 75.14        | <b>75.93</b> | 75.35        | 75.47        | 75.01        |
|                     | 1.00E-03 | 72.22        | 73.02        | 72.06        | 71.59        | 72.66        |
|                     | 1.00E-04 | 60.57        | 61.47        | 61.36        | 60.87        | 61.05        |
| SGD / Cosine        | 1.00E-01 | 47.18        | 67.41        | 71.40        | 70.67        | 58.93        |
|                     | 1.00E-02 | 74.72        | 74.30        | 74.67        | 74.10        | <b>75.04</b> |
|                     | 1.00E-03 | 72.19        | 72.18        | 72.63        | 72.22        | 72.28        |
|                     | 1.00E-04 | 61.65        | 61.62        | 60.49        | 61.08        | 60.43        |
| Adam / Cosine       | 1.00E-02 | 45.92        | 45.80        | 44.37        | 39.69        | 48.06        |
|                     | 1.00E-03 | 71.99        | 73.59        | 69.36        | 69.03        | 68.68        |

|                 |          |          |              |              |              |       |
|-----------------|----------|----------|--------------|--------------|--------------|-------|
|                 | 1.00E-04 | 75.17    | <b>75.73</b> | 75.15        | 75.33        | 73.55 |
|                 | 1.00E-05 | 70.62    | 71.73        | 71.19        | 71.99        | 71.71 |
|                 |          |          |              |              |              |       |
|                 |          |          |              |              |              |       |
| EfficientNet B0 |          |          |              |              |              |       |
|                 | lr \ wd  | 1.00E-03 | 1.00E-04     | 1.00E-05     | 1.00E-06     | 0     |
| SGD / Step      | 1.00E-01 | 67.83    | 68.36        | 65.43        | 70.16        | 67.83 |
|                 | 1.00E-02 | 68.57    | 69.20        | 68.47        | <b>70.26</b> | 68.02 |
|                 | 1.00E-03 | 63.52    | 62.43        | 64.32        | 63.18        | 64.23 |
|                 | 1.00E-04 | 52.12    | 48.64        | 49.17        | 49.90        | 53.18 |
| SGD / Cosine    | 1.00E-01 | 67.93    | 66.17        | 67.69        | 65.08        | 65.66 |
|                 | 1.00E-02 | 67.62    | 67.77        | <b>71.02</b> | 66.83        | 68.53 |
|                 | 1.00E-03 | 65.69    | 63.72        | 64.98        | 63.05        | 64.20 |
|                 | 1.00E-04 | 53.72    | 49.83        | 51.16        | 48.79        | 53.60 |
| Adam / Cosine   | 1.00E-02 | 62.30    | 62.16        | 65.82        | 66.22        | 67.06 |
|                 | 1.00E-03 | 70.88    | 67.85        | 70.06        | <b>70.97</b> | 69.76 |
|                 | 1.00E-04 | 68.27    | 67.07        | 66.83        | 65.92        | 67.79 |
|                 | 1.00E-05 | 60.00    | 61.08        | 59.95        | 57.42        | 57.62 |
|                 |          |          |              |              |              |       |
|                 |          |          |              |              |              |       |
| EfficientNet B4 |          |          |              |              |              |       |
|                 | lr \ wd  | 1.00E-03 | 1.00E-04     | 1.00E-05     | 1.00E-06     | 0     |
| SGD / Step      | 1.00E-01 | 70.41    | 71.15        | <b>72.48</b> | 71.43        | 69.17 |
|                 | 1.00E-02 | 66.26    | 67.49        | 66.40        | 67.69        | 67.95 |
|                 | 1.00E-03 | 52.49    | 51.58        | 50.48        | 51.30        | 50.67 |
|                 | 1.00E-04 | 33.51    | 33.72        | 30.82        | 34.33        | 32.97 |
| SGD / Cosine    | 1.00E-01 | 69.30    | 70.86        | <b>71.28</b> | 70.26        | 70.63 |
|                 | 1.00E-02 | 68.04    | 67.42        | 65.27        | 66.61        | 65.93 |
|                 | 1.00E-03 | 52.36    | 49.62        | 49.62        | 49.50        | 47.45 |
|                 | 1.00E-04 | 34.17    | 31.71        | 32.85        | 34.22        | 32.67 |
| Adam / Cosine   | 1.00E-02 | 72.06    | 71.19        | 71.80        | 69.32        | 73.32 |

|                  |          |              |              |              |              |       |
|------------------|----------|--------------|--------------|--------------|--------------|-------|
|                  | 1.00E-03 | 72.91        | 69.55        | 69.77        | <b>73.49</b> | 71.08 |
|                  | 1.00E-04 | 69.54        | 68.10        | 67.19        | 68.31        | 68.26 |
|                  | 1.00E-05 | 64.06        | 57.56        | 57.50        | 56.29        | 57.10 |
|                  |          |              |              |              |              |       |
|                  |          |              |              |              |              |       |
| DenseNet-121     |          |              |              |              |              |       |
|                  | lr \ wd  | 1.00E-03     | 1.00E-04     | 1.00E-05     | 1.00E-06     | 0     |
| SGD / Step       | 1.00E-01 | 49.05        | 43.58        | 44.27        | 47.79        | 45.80 |
|                  | 1.00E-02 | 72.19        | 73.72        | 72.03        | 73.96        | 72.09 |
|                  | 1.00E-03 | 73.14        | <b>74.45</b> | 73.04        | 73.00        | 72.19 |
|                  | 1.00E-04 | 57.15        | 58.13        | 58.02        | 56.70        | 58.77 |
| SGD / Cosine     | 1.00E-01 | 45.59        | 48.90        | 46.30        | 44.57        | 44.23 |
|                  | 1.00E-02 | 73.43        | 72.65        | <b>74.66</b> | 71.49        | 73.04 |
|                  | 1.00E-03 | 72.55        | 73.03        | 72.97        | 72.71        | 71.82 |
|                  | 1.00E-04 | 56.76        | 58.46        | 58.16        | 59.36        | 57.00 |
| Adam / Cosine    | 1.00E-02 | 51.02        | 46.93        | 48.18        | 44.14        | 46.89 |
|                  | 1.00E-03 | 71.87        | 71.33        | 71.50        | 70.73        | 72.46 |
|                  | 1.00E-04 | <b>74.24</b> | 74.12        | 73.62        | 71.94        | 69.95 |
|                  | 1.00E-05 | 63.83        | 70.46        | 72.05        | 69.60        | 71.20 |
|                  |          |              |              |              |              |       |
|                  |          |              |              |              |              |       |
| ResNeXt-50-32x4d |          |              |              |              |              |       |
|                  | lr \ wd  | 1.00E-03     | 1.00E-04     | 1.00E-05     | 1.00E-06     | 0     |
| SGD / Step       | 1.00E-01 | 43.21        | 48.61        | 46.82        | 44.02        | 46.20 |
|                  | 1.00E-02 | 72.01        | 71.63        | 72.99        | 71.70        | 72.72 |
|                  | 1.00E-03 | 72.22        | 72.21        | <b>73.73</b> | 72.99        | 72.12 |
|                  | 1.00E-04 | 61.85        | 59.93        | 61.87        | 61.20        | 61.39 |
| SGD / Cosine     | 1.00E-01 | 49.97        | 44.78        | 43.40        | 44.99        | 46.84 |
|                  | 1.00E-02 | 73.16        | 73.22        | 72.13        | 72.68        | 71.77 |
|                  | 1.00E-03 | 71.77        | 71.84        | <b>73.24</b> | 70.96        | 71.01 |
|                  | 1.00E-04 | 61.63        | 59.80        | 60.92        | 59.77        | 59.80 |

|                    |          |              |          |              |          |       |
|--------------------|----------|--------------|----------|--------------|----------|-------|
| Adam / Cosine      | 1.00E-02 | 50.94        | 51.40    | 47.81        | 48.28    | 47.23 |
|                    | 1.00E-03 | 71.79        | 71.17    | 70.82        | 72.24    | 71.84 |
|                    | 1.00E-04 | 68.45        | 73.19    | <b>73.39</b> | 72.70    | 71.42 |
|                    | 1.00E-05 | 70.17        | 71.53    | 69.37        | 71.56    | 72.11 |
|                    |          |              |          |              |          |       |
|                    |          |              |          |              |          |       |
| ShuffleNet v2 x1.0 |          |              |          |              |          |       |
|                    | lr \ wd  | 1.00E-03     | 1.00E-04 | 1.00E-05     | 1.00E-06 | 0     |
| SGD / Step         | 1.00E-01 | 69.10        | 69.04    | 68.43        | 66.23    | 67.43 |
|                    | 1.00E-02 | <b>69.27</b> | 66.79    | 66.29        | 67.05    | 68.14 |
|                    | 1.00E-03 | 32.27        | 30.98    | 32.47        | 33.47    | 35.27 |
|                    | 1.00E-04 | 33.95        | 31.35    | 29.00        | 35.07    | 33.20 |
| SGD / Cosine       | 1.00E-01 | 67.33        | 64.30    | <b>68.72</b> | 64.92    | 68.46 |
|                    | 1.00E-02 | 68.60        | 65.83    | 67.23        | 65.96    | 66.39 |
|                    | 1.00E-03 | 31.28        | 31.98    | 32.05        | 33.47    | 32.41 |
|                    | 1.00E-04 | 32.37        | 28.84    | 34.61        | 28.38    | 33.60 |
| Adam / Cosine      | 1.00E-02 | 63.39        | 65.99    | 62.09        | 63.71    | 63.71 |
|                    | 1.00E-03 | 66.67        | 66.53    | <b>69.18</b> | 66.36    | 68.82 |
|                    | 1.00E-04 | 67.46        | 61.70    | 66.09        | 64.57    | 64.98 |
|                    | 1.00E-05 | 34.18        | 42.06    | 42.47        | 43.12    | 42.50 |
|                    |          |              |          |              |          |       |
|                    |          |              |          |              |          |       |
| ConvNext tiny      |          |              |          |              |          |       |
|                    | lr \ wd  | 1.00E-03     | 1.00E-04 | 1.00E-05     | 1.00E-06 | 0     |
| SGD / Step         | 1.00E-01 | 52.97        | 44.90    | 48.03        | 42.58    | 46.09 |
|                    | 1.00E-02 | <b>76.25</b> | 74.10    | 76.17        | 75.22    | 75.87 |
|                    | 1.00E-03 | 74.20        | 73.26    | 72.59        | 72.41    | 72.22 |
|                    | 1.00E-04 | 55.19        | 51.83    | 52.90        | 54.26    | 52.23 |
| SGD / Cosine       | 1.00E-01 | 45.28        | 48.37    | 44.84        | 47.14    | 49.61 |
|                    | 1.00E-02 | 74.56        | 75.93    | <b>77.09</b> | 75.88    | 76.22 |
|                    | 1.00E-03 | 73.93        | 72.99    | 73.91        | 74.98    | 73.95 |



|                    |         |          |              |              |          |              |              |
|--------------------|---------|----------|--------------|--------------|----------|--------------|--------------|
|                    |         | 1.00E-04 | 53.18        | 53.28        | 51.98    | 52.40        | 53.32        |
| Adam / Cosine      |         | 1.00E-02 | 47.03        | 11.88        | 11.88    | 11.88        | 11.88        |
|                    |         | 1.00E-03 | 70.77        | 75.58        | 76.11    | 73.72        | 74.22        |
|                    |         | 1.00E-04 | 68.20        | 77.79        | 77.46    | 77.53        | <b>78.51</b> |
|                    |         | 1.00E-05 | 46.70        | 74.76        | 72.45    | 73.22        | 72.58        |
|                    |         |          |              |              |          |              |              |
|                    |         |          |              |              |          |              |              |
| ShuffleNet_V2_X0_5 |         |          |              |              |          |              |              |
|                    | lr \ wd |          | 1.00E-03     | 1.00E-04     | 1.00E-05 | 1.00E-06     | 0            |
| SGD / Step         |         | 1.00E-01 | 66.22        | <b>66.37</b> | 64.05    | 65.32        | 64.69        |
|                    |         | 1.00E-02 | 61.79        | 58.49        | 61.75    | 58.53        | 60.35        |
|                    |         | 1.00E-03 | 35.75        | 37.06        | 38.28    | 37.97        | 34.96        |
|                    |         | 1.00E-04 | 36.96        | 29.92        | 28.16    | 30.31        | 31.85        |
| SGD / Cosine       |         | 1.00E-01 | 65.40        | 65.36        | 63.74    | <b>66.37</b> | 66.09        |
|                    |         | 1.00E-02 | 60.47        | 60.99        | 58.86    | 58.10        | 56.72        |
|                    |         | 1.00E-03 | 35.34        | 38.16        | 37.53    | 37.17        | 37.25        |
|                    |         | 1.00E-04 | 29.90        | 29.85        | 31.34    | 28.68        | 29.75        |
| Adam / Cosine      |         | 1.00E-02 | 61.17        | 64.34        | 61.77    | 64.00        | 63.56        |
|                    |         | 1.00E-03 | <b>64.48</b> | 63.69        | 63.69    | 62.66        | 61.75        |
|                    |         | 1.00E-04 | 57.52        | 57.46        | 59.22    | 57.61        | 57.13        |
|                    |         | 1.00E-05 | 33.87        | 47.62        | 47.23    | 46.60        | 41.02        |
|                    |         |          |              |              |          |              |              |
|                    |         |          |              |              |          |              |              |
| SqueezeNet1_1      |         |          |              |              |          |              |              |
|                    | lr \ wd |          | 1.00E-03     | 1.00E-04     | 1.00E-05 | 1.00E-06     | 0            |
| SGD / Step         |         | 1.00E-01 | 29.81        | 29.81        | 29.81    | 29.81        | 29.81        |
|                    |         | 1.00E-02 | 59.48        | 50.30        | 61.40    | 51.23        | 50.70        |
|                    |         | 1.00E-03 | 64.69        | <b>66.09</b> | 62.42    | 65.49        | 64.38        |
|                    |         | 1.00E-04 | 57.28        | 56.71        | 53.72    | 56.63        | 54.61        |
| SGD / Cosine       |         | 1.00E-01 | 29.81        | 29.81        | 29.81    | 29.81        | 29.81        |
|                    |         | 1.00E-02 | 47.59        | 64.60        | 62.96    | 46.86        | 65.01        |

|               |          |       |       |       |       |              |
|---------------|----------|-------|-------|-------|-------|--------------|
|               | 1.00E-03 | 64.66 | 65.86 | 63.47 | 63.20 | <b>66.36</b> |
|               | 1.00E-04 | 55.78 | 58.41 | 53.01 | 56.42 | 55.06        |
| Adam / Cosine | 1.00E-02 | 44.56 | 11.88 | 11.88 | 43.69 | 41.52        |
|               | 1.00E-03 | 51.65 | 60.04 | 64.14 | 64.71 | 60.46        |
|               | 1.00E-04 | 50.08 | 63.41 | 64.35 | 64.58 | <b>65.63</b> |
|               | 1.00E-05 | 41.68 | 52.34 | 57.18 | 56.77 | 53.68        |
