# Supplementary material
Source: ML conference proceedings conference paper supplement (https://openreview.net/forum?id=7T2XgpklLDA)
Supplement: supplementary_material [file attachment]

|               |          |              |              |          |              |       |
|---------------|----------|--------------|--------------|----------|--------------|-------|
| ResNet 50     |          |              |              |          |              |       |
|               | lr \ wd  | 1.00E-03     | 1.00E-04     | 1.00E-05 | 1.00E-06     | 0     |
| SGD / Step    | 1.00E-01 | 95.43        | 93.96        | 96.57    | 94.59        | 95.43 |
|               | 1.00E-02 | <b>99.13</b> | 98.85        | 98.69    | 98.81        | 98.85 |
|               | 1.00E-03 | 98.72        | 98.80        | 98.59    | 98.63        | 98.57 |
|               | 1.00E-04 | 96.83        | 96.69        | 96.63    | 96.72        | 96.85 |
| SGD / Cosine  | 1.00E-01 | 96.61        | 93.76        | 94.00    | 87.26        | 94.54 |
|               | 1.00E-02 | <b>99.04</b> | 98.87        | 98.94    | 98.80        | 98.87 |
|               | 1.00E-03 | 98.67        | 98.56        | 98.57    | 98.65        | 98.50 |
|               | 1.00E-04 | 96.63        | 96.39        | 96.74    | 96.74        | 96.56 |
| Adam / Cosine | 1.00E-02 | 96.93        | 96.83        | 96.81    | 95.37        | 96.67 |
|               | 1.00E-03 | 98.56        | 98.54        | 98.43    | 98.57        | 98.54 |
|               | 1.00E-04 | 98.63        | 99.09        | 99.06    | <b>99.19</b> | 99.07 |
|               | 1.00E-05 | 97.89        | 98.76        | 98.57    | 98.57        | 98.67 |
|               |          |              |              |          |              |       |
|               |          |              |              |          |              |       |
| AlexNet       |          |              |              |          |              |       |
|               | lr \ wd  | 1.00E-03     | 1.00E-04     | 1.00E-05 | 1.00E-06     | 0     |
| SGD / Step    | 1.00E-01 | 0.00         | 0.00         | 0.00     | 0.00         | 0.00  |
|               | 1.00E-02 | 97.13        | <b>97.69</b> | 0.00     | 11.11        | 97.04 |
|               | 1.00E-03 | 97.56        | 97.33        | 97.59    | 97.28        | 97.48 |
|               | 1.00E-04 | 94.43        | 94.76        | 94.48    | 94.72        | 94.65 |
| SGD / Cosine  | 1.00E-01 | 0.00         | 0.00         | 0.00     | 0.00         | 0.00  |
|               | 1.00E-02 | <b>97.74</b> | 97.65        | 0.00     | 0.00         | 11.11 |
|               | 1.00E-03 | 97.46        | 97.37        | 97.43    | 97.26        | 97.43 |
|               | 1.00E-04 | 94.69        | 94.63        | 94.63    | 94.65        | 94.56 |
| Adam / Cosine | 1.00E-02 | 11.63        | 11.11        | 11.11    | 11.11        | 11.11 |
|               | 1.00E-03 | 97.04        | 97.39        | 97.13    | 96.87        | 97.35 |
|               | 1.00E-04 | 96.33        | <b>97.93</b> | 97.81    | <b>97.93</b> | 97.80 |
|               | 1.00E-05 | 88.52        | 95.96        | 96.15    | 96.13        | 96.22 |
|               |          |              |              |          |              |       |
|               |          |              |              |          |              |       |

|               |          |              |              |              |          |              |
|---------------|----------|--------------|--------------|--------------|----------|--------------|
| VGG13BN       |          |              |              |              |          |              |
|               | lr \ wd  | 1.00E-03     | 1.00E-04     | 1.00E-05     | 1.00E-06 | 0            |
| SGD / Step    | 1.00E-01 | 97.56        | 97.74        | 97.43        | 97.89    | 97.56        |
|               | 1.00E-02 | 98.67        | 98.70        | <b>98.83</b> | 98.50    | 98.54        |
|               | 1.00E-03 | 98.24        | 98.07        | 98.26        | 98.24    | 98.20        |
|               | 1.00E-04 | 96.11        | 96.00        | 95.69        | 95.96    | 95.98        |
| SGD / Cosine  | 1.00E-01 | 97.96        | 97.89        | 97.85        | 97.81    | 97.65        |
|               | 1.00E-02 | 98.69        | 98.63        | 98.70        | 98.63    | <b>98.85</b> |
|               | 1.00E-03 | 98.11        | 98.11        | 98.07        | 98.19    | 98.13        |
|               | 1.00E-04 | 96.07        | 95.91        | 95.94        | 96.24    | 96.06        |
| Adam / Cosine | 1.00E-02 | 95.67        | 85.52        | 84.61        | 55.81    | 90.80        |
|               | 1.00E-03 | 98.17        | 98.24        | 98.11        | 98.30    | 98.19        |
|               | 1.00E-04 | <b>98.65</b> | 98.61        | 98.59        | 98.54    | 98.54        |
|               | 1.00E-05 | 98.07        | 98.02        | 98.06        | 97.94    | 97.87        |
|               |          |              |              |              |          |              |
|               |          |              |              |              |          |              |
| PNASNet5      |          |              |              |              |          |              |
|               | lr \ wd  | 1.00E-03     | 1.00E-04     | 1.00E-05     | 1.00E-06 | 0            |
| SGD / Step    | 1.00E-01 | 98.41        | 98.78        | 98.76        | 98.50    | 98.74        |
|               | 1.00E-02 | <b>98.85</b> | <b>98.85</b> | 98.81        | 98.81    | 98.80        |
|               | 1.00E-03 | 98.09        | 98.04        | 98.07        | 98.02    | 97.96        |
|               | 1.00E-04 | 95.26        | 95.11        | 95.37        | 95.33    | 95.65        |
| SGD / Cosine  | 1.00E-01 | 98.46        | 99.07        | <b>99.13</b> | 99.00    | 99.09        |
|               | 1.00E-02 | 98.89        | 98.93        | 98.69        | 98.80    | 98.65        |
|               | 1.00E-03 | 98.00        | 97.94        | 97.96        | 97.98    | 97.98        |
|               | 1.00E-04 | 95.28        | 95.15        | 95.30        | 95.41    | 95.41        |
| Adam / Cosine | 1.00E-02 | 97.83        | 97.20        | 97.44        | 96.74    | 97.78        |
|               | 1.00E-03 | 98.54        | 98.94        | 98.96        | 98.65    | 98.80        |
|               | 1.00E-04 | 98.67        | 99.04        | <b>99.17</b> | 99.02    | 99.13        |
|               | 1.00E-05 | 96.85        | 98.63        | 98.69        | 98.46    | 98.52        |
|               |          |              |              |              |          |              |

|                   |          |              |              |          |              |       |
|-------------------|----------|--------------|--------------|----------|--------------|-------|
|                   |          |              |              |          |              |       |
| Resnet152         |          |              |              |          |              |       |
|                   | lr \ wd  | 1.00E-03     | 1.00E-04     | 1.00E-05 | 1.00E-06     | 0     |
| SGD / Step        | 1.00E-01 | 96.54        | 96.28        | 93.61    | 95.94        | 89.37 |
|                   | 1.00E-02 | <b>99.02</b> | 98.96        | 98.96    | 98.69        | 98.96 |
|                   | 1.00E-03 | 98.72        | 98.61        | 98.63    | 98.54        | 98.80 |
|                   | 1.00E-04 | 96.78        | 96.78        | 96.70    | 97.02        | 96.76 |
| SGD / Cosine      | 1.00E-01 | 96.87        | 90.63        | 96.28    | 93.87        | 94.35 |
|                   | 1.00E-02 | <b>99.02</b> | 98.91        | 98.85    | 98.74        | 99.00 |
|                   | 1.00E-03 | 98.44        | 98.43        | 98.57    | 98.54        | 98.43 |
|                   | 1.00E-04 | 96.35        | 96.50        | 96.37    | 96.26        | 96.65 |
| Adam / Cosine     | 1.00E-02 | 96.48        | 96.30        | 96.80    | 96.54        | 96.70 |
|                   | 1.00E-03 | 98.50        | 98.48        | 98.57    | 98.59        | 98.54 |
|                   | 1.00E-04 | 98.50        | 99.09        | 99.00    | <b>99.15</b> | 99.09 |
|                   | 1.00E-05 | 97.35        | 98.70        | 98.69    | 98.44        | 98.56 |
|                   |          |              |              |          |              |       |
|                   |          |              |              |          |              |       |
|                   |          |              |              |          |              |       |
| MobileNetV3 Small |          |              |              |          |              |       |
|                   | lr \ wd  | 1.00E-03     | 1.00E-04     | 1.00E-05 | 1.00E-06     | 0     |
| SGD / Step        | 1.00E-01 | 96.91        | 98.74        | 98.61    | 98.67        | 98.52 |
|                   | 1.00E-02 | 98.91        | <b>99.00</b> | 98.85    | 98.83        | 98.76 |
|                   | 1.00E-03 | 97.70        | 97.74        | 97.57    | 97.39        | 97.35 |
|                   | 1.00E-04 | 92.41        | 92.70        | 92.69    | 92.28        | 92.80 |
| SGD / Cosine      | 1.00E-01 | 97.50        | 98.70        | 98.76    | <b>99.00</b> | 98.76 |
|                   | 1.00E-02 | 98.91        | 98.94        | 98.89    | 98.76        | 98.70 |
|                   | 1.00E-03 | 97.54        | 97.48        | 97.54    | 97.54        | 97.43 |
|                   | 1.00E-04 | 92.13        | 92.43        | 92.43    | 92.80        | 92.54 |
| Adam / Cosine     | 1.00E-02 | 97.67        | 98.31        | 98.61    | 98.46        | 98.72 |
|                   | 1.00E-03 | 96.85        | <b>99.15</b> | 99.00    | <b>99.15</b> | 99.11 |
|                   | 1.00E-04 | 78.94        | 98.96        | 98.81    | 98.65        | 98.59 |
|                   | 1.00E-05 | 19.11        | 96.65        | 96.54    | 96.39        | 96.41 |

|               |          |              |          |              |              |              |
|---------------|----------|--------------|----------|--------------|--------------|--------------|
|               |          |              |          |              |              |              |
|               |          |              |          |              |              |              |
| DeiT Tiny     |          |              |          |              |              |              |
|               | lr \ wd  | 1.00E-03     | 1.00E-04 | 1.00E-05     | 1.00E-06     | 0            |
| SGD / Step    | 1.00E-01 | 0.00         | 33.15    | 22.24        | 24.13        | 28.67        |
|               | 1.00E-02 | 98.80        | 98.93    | 98.78        | 98.87        | 98.87        |
|               | 1.00E-03 | 98.81        | 98.89    | <b>98.96</b> | 98.91        | 98.91        |
|               | 1.00E-04 | 98.04        | 97.80    | 97.91        | 97.89        | 97.70        |
| SGD / Cosine  | 1.00E-01 | 11.15        | 18.28    | 96.24        | 58.72        | 43.87        |
|               | 1.00E-02 | <b>99.07</b> | 98.85    | 98.98        | 98.94        | 98.91        |
|               | 1.00E-03 | 98.93        | 98.72    | 98.98        | 98.94        | 98.89        |
|               | 1.00E-04 | 97.74        | 97.69    | 97.76        | 97.78        | 97.89        |
| Adam / Cosine | 1.00E-02 | 93.70        | 66.96    | 49.85        | 56.09        | 49.44        |
|               | 1.00E-03 | 96.26        | 98.24    | 97.98        | 97.87        | 98.04        |
|               | 1.00E-04 | 95.69        | 98.94    | <b>99.11</b> | 99.02        | 99.04        |
|               | 1.00E-05 | 78.91        | 97.98    | 98.50        | 98.57        | 98.69        |
|               |          |              |          |              |              |              |
|               |          |              |          |              |              |              |
| DeiT Small    |          |              |          |              |              |              |
|               | lr \ wd  | 1.00E-03     | 1.00E-04 | 1.00E-05     | 1.00E-06     | 0            |
| SGD / Step    | 1.00E-01 | 0.00         | 40.61    | 38.22        | 24.39        | 32.80        |
|               | 1.00E-02 | 99.00        | 99.04    | 99.04        | <b>99.06</b> | <b>99.06</b> |
|               | 1.00E-03 | 99.00        | 98.91    | 98.96        | 98.93        | 98.87        |
|               | 1.00E-04 | 97.76        | 97.33    | 97.74        | 97.52        | 97.91        |
| SGD / Cosine  | 1.00E-01 | 0.00         | 0.00     | 0.00         | 10.22        | 0.00         |
|               | 1.00E-02 | 99.06        | 99.15    | <b>99.20</b> | 99.02        | 99.04        |
|               | 1.00E-03 | 98.96        | 98.96    | 98.93        | 99.06        | 98.96        |
|               | 1.00E-04 | 97.56        | 97.56    | 97.59        | 97.69        | 97.46        |
| Adam / Cosine | 1.00E-02 | 89.28        | 57.61    | 46.48        | 51.43        | 44.85        |
|               | 1.00E-03 | 96.61        | 98.15    | 98.28        | 98.13        | 98.41        |
|               | 1.00E-04 | 95.76        | 99.13    | 99.11        | <b>99.17</b> | 99.15        |

|                    |          |          |              |              |              |              |
|--------------------|----------|----------|--------------|--------------|--------------|--------------|
|                    | 1.00E-05 | 90.30    | 98.69        | 98.87        | 98.76        | 99.02        |
|                    |          |          |              |              |              |              |
|                    |          |          |              |              |              |              |
| ShuffleNet_V2_X0_5 |          |          |              |              |              |              |
|                    | lr \ wd  | 1.00E-03 | 1.00E-04     | 1.00E-05     | 1.00E-06     | 0            |
| SGD / Step         | 1.00E-01 | 97.78    | 98.43        | 98.30        | 98.50        | <b>98.52</b> |
|                    | 1.00E-02 | 98.06    | 97.96        | 97.83        | 97.91        | 97.96        |
|                    | 1.00E-03 | 71.30    | 73.67        | 72.28        | 73.65        | 71.13        |
|                    | 1.00E-04 | 33.81    | 33.31        | 36.00        | 33.19        | 36.17        |
| SGD / Cosine       | 1.00E-01 | 98.28    | 98.48        | 98.46        | <b>98.52</b> | 98.46        |
|                    | 1.00E-02 | 97.80    | 97.87        | 97.80        | 97.94        | 97.72        |
|                    | 1.00E-03 | 66.33    | 73.09        | 72.59        | 74.37        | 65.70        |
|                    | 1.00E-04 | 26.28    | 36.98        | 33.09        | 41.63        | 35.74        |
| Adam / Cosine      | 1.00E-02 | 97.96    | 98.33        | 98.19        | 98.31        | 98.19        |
|                    | 1.00E-03 | 98.50    | 98.50        | <b>98.56</b> | 98.50        | 98.52        |
|                    | 1.00E-04 | 97.76    | 97.67        | 97.19        | 97.22        | 97.43        |
|                    | 1.00E-05 | 56.04    | 73.46        | 72.15        | 73.69        | 75.65        |
|                    |          |          |              |              |              |              |
|                    |          |          |              |              |              |              |
|                    |          |          |              |              |              |              |
| SqueezeNet1_1      |          |          |              |              |              |              |
|                    | lr \ wd  | 1.00E-03 | 1.00E-04     | 1.00E-05     | 1.00E-06     | 0            |
| SGD / Step         | 1.00E-01 | 11.11    | 11.11        | 11.11        | 11.11        | 11.11        |
|                    | 1.00E-02 | 97.39    | 11.11        | 11.11        | 96.65        | 97.31        |
|                    | 1.00E-03 | 97.33    | <b>97.87</b> | 97.59        | 97.44        | 97.69        |
|                    | 1.00E-04 | 95.69    | 95.76        | 95.67        | 95.44        | 94.96        |
| SGD / Cosine       | 1.00E-01 | 11.11    | 11.11        | 11.11        | 11.11        | 11.11        |
|                    | 1.00E-02 | 96.67    | 11.13        | 95.04        | 97.57        | 96.15        |
|                    | 1.00E-03 | 97.74    | 97.72        | 97.63        | 97.85        | <b>97.91</b> |
|                    | 1.00E-04 | 95.56    | 95.93        | 95.24        | 95.56        | 95.76        |
| Adam / Cosine      | 1.00E-02 | 11.11    | 86.63        | 84.09        | 11.11        | 86.37        |

|  |          |       |       |              |       |       |
|--|----------|-------|-------|--------------|-------|-------|
|  | 1.00E-03 | 93.98 | 97.80 | <b>98.07</b> | 97.81 | 97.91 |
|  | 1.00E-04 | 88.17 | 97.46 | 97.67        | 97.69 | 97.89 |
|  | 1.00E-05 | 70.06 | 92.28 | 94.98        | 95.17 | 95.02 |
